# Supplementary material for: Conformational equilibria in selected A-type trimeric procyanidins
Source: Royal Society of Chemistry journal article supplement (doi:10.1039/c4ob02086c), 2014-10-09
Supplement: c4ob02086c1.pdf [file c4ob02086c1.pdf]

Supplementary Information

to

## **Conformational equilibria in the selected A-type trimeric procyanidins**

by

Marta K. Dudek (Jamróz)<sup>a,\*</sup>, Sławomir Kaźmierski<sup>a,b</sup>, Kamil Stefaniak<sup>a</sup>, Witold B. Gliński<sup>c</sup>,  
Jan A. Gliński<sup>c</sup>

<sup>a</sup> Physical Chemistry Department, Faculty of Pharmacy, Medical University of Warsaw, Banacha 1, 02097 Warsaw, Poland,

<sup>b</sup> Centre of Molecular and Macromolecular Studies PAS, Sienkiewicza 112, 90363 Lodz, Poland, [kaslawek@cbmm.lodz.pl](mailto:kaslawek@cbmm.lodz.pl)

<sup>c</sup> Planta Analytica LLC, 39 Rose Street, Danbury, CT 06810, USA, [jan@plantaanalytica.com](mailto:jan@plantaanalytica.com)

## CONTENT:

|                                                                                         |             |
|-----------------------------------------------------------------------------------------|-------------|
| <sup>1</sup> H NMR spectrum of <b>1</b> in MeOD                                         | page 3      |
| <sup>1</sup> H NMR spectrum of <b>1</b> in DMSO                                         | page 4      |
| <sup>1</sup> H NMR spectrum of <b>1</b> in acetone-d <sub>6</sub>                       | page 5      |
| <sup>1</sup> H NMR spectrum of <b>1</b> in pyridine-d <sub>5</sub>                      | page 6      |
| <sup>1</sup> H NMR spectrum of <b>2</b> in MeOD                                         | page 7      |
| <sup>1</sup> H NMR spectrum of <b>2</b> in DMSO                                         | page 8      |
| <sup>1</sup> H NMR spectrum of <b>2</b> in acetone-d <sub>6</sub>                       | page 9      |
| <sup>1</sup> H NMR spectrum of <b>2</b> in pyridine-d <sub>5</sub>                      | page 10     |
| <sup>1</sup> H NMR spectrum of <b>3</b> in MeOD                                         | page 11     |
| <sup>1</sup> H NMR spectrum of <b>3</b> in DMSO                                         | page 12     |
| <sup>1</sup> H NMR spectrum of <b>3</b> in acetone-d <sub>6</sub>                       | page 13     |
| <sup>1</sup> H NMR spectrum of <b>3</b> in pyridine-d <sub>5</sub>                      | page 14     |
| <sup>1</sup> H NMR spectrum of <b>4</b> in MeOD                                         | page 15     |
| <sup>1</sup> H NMR spectrum of <b>4</b> in DMSO                                         | page 16     |
| <sup>1</sup> H NMR spectrum of <b>4</b> in acetone-d <sub>6</sub>                       | page 17     |
| <sup>1</sup> H NMR spectrum of <b>4</b> in pyridine-d <sub>5</sub>                      | page 18     |
| <b>Table 1SI</b> (computational data for the lowest-energy conformers)                  | page 19     |
| Signal assignment for minor and major rotamers of 1-4 in MeOD and DMSO-d <sub>6</sub>   | pages 20-25 |
| $\Delta G^{298}$ calculations procedure from the <sup>1</sup> H temperature NMR spectra | page 26     |

Cinnamtannin B-1 (1) in MeOD

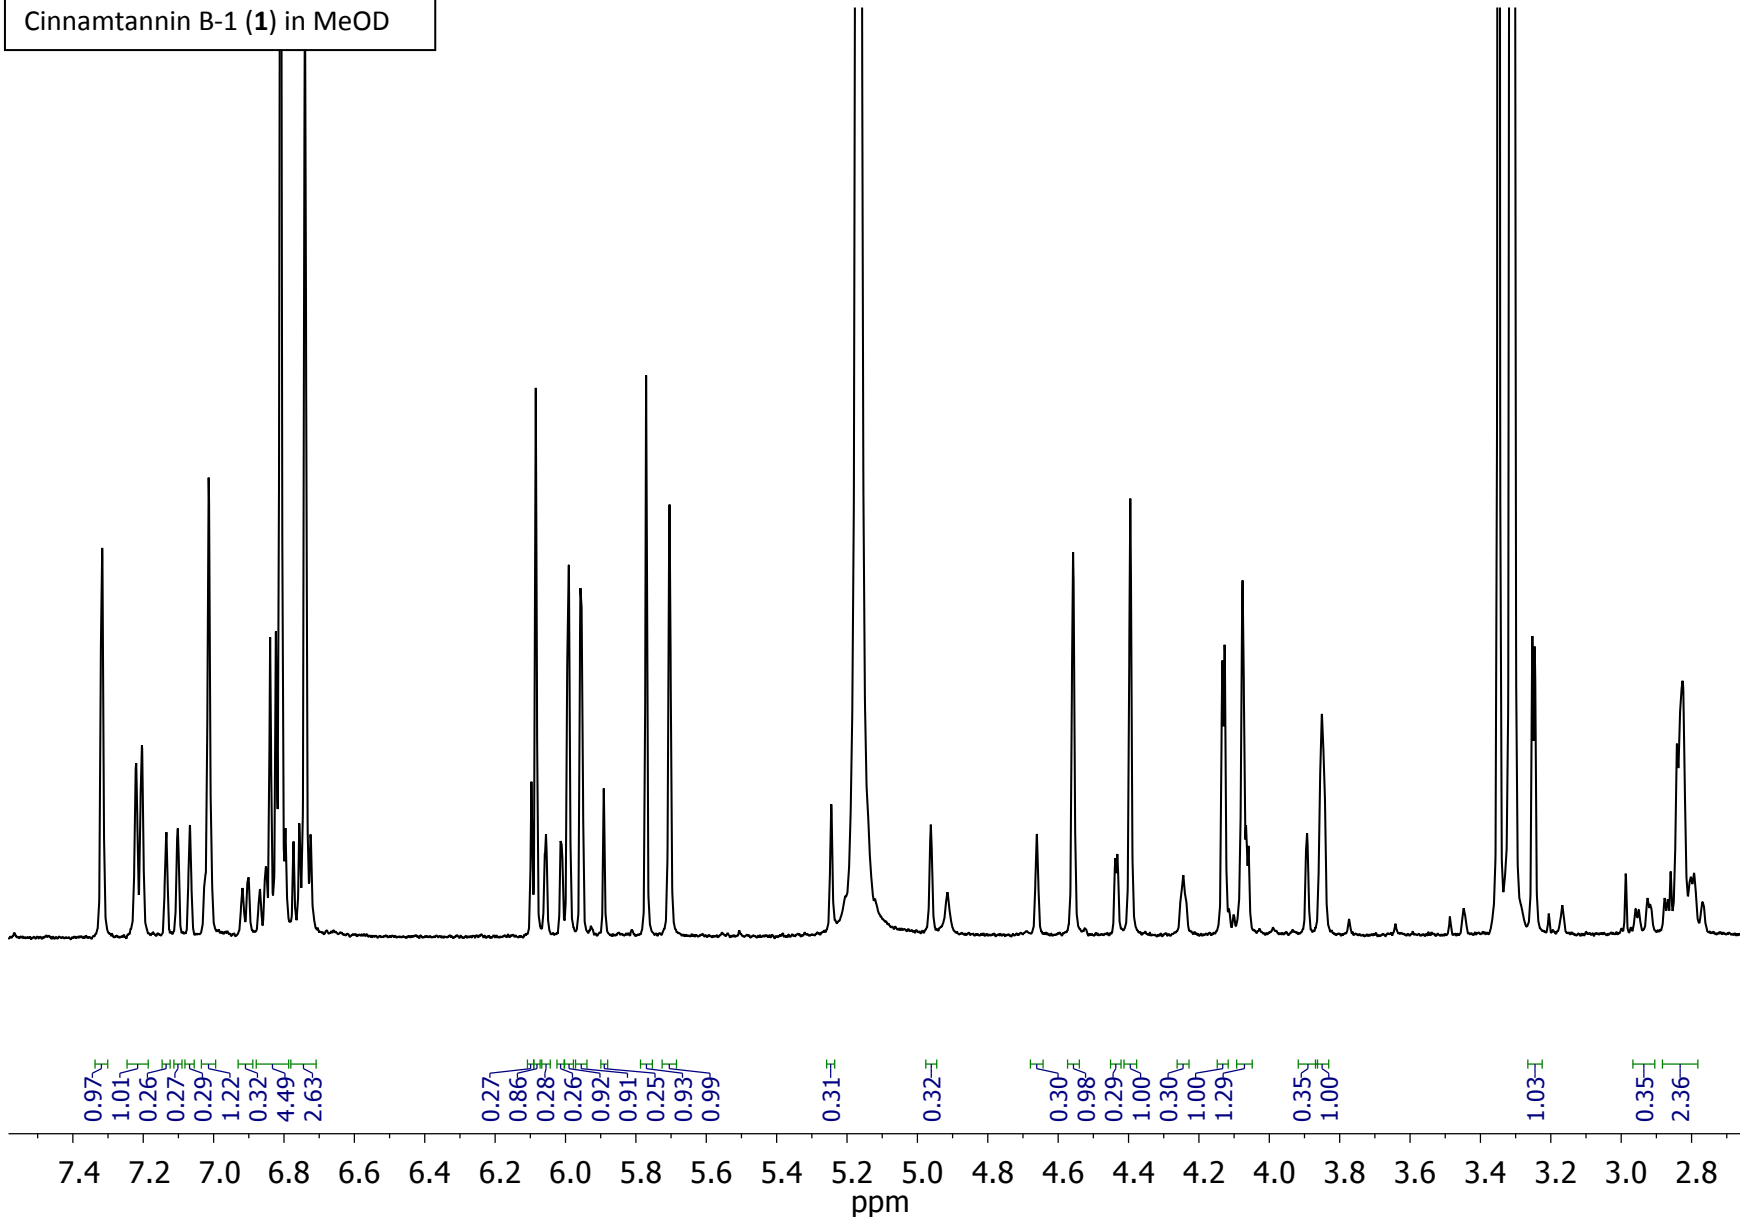

Cinnamtannin B-1 (1) in DMSO

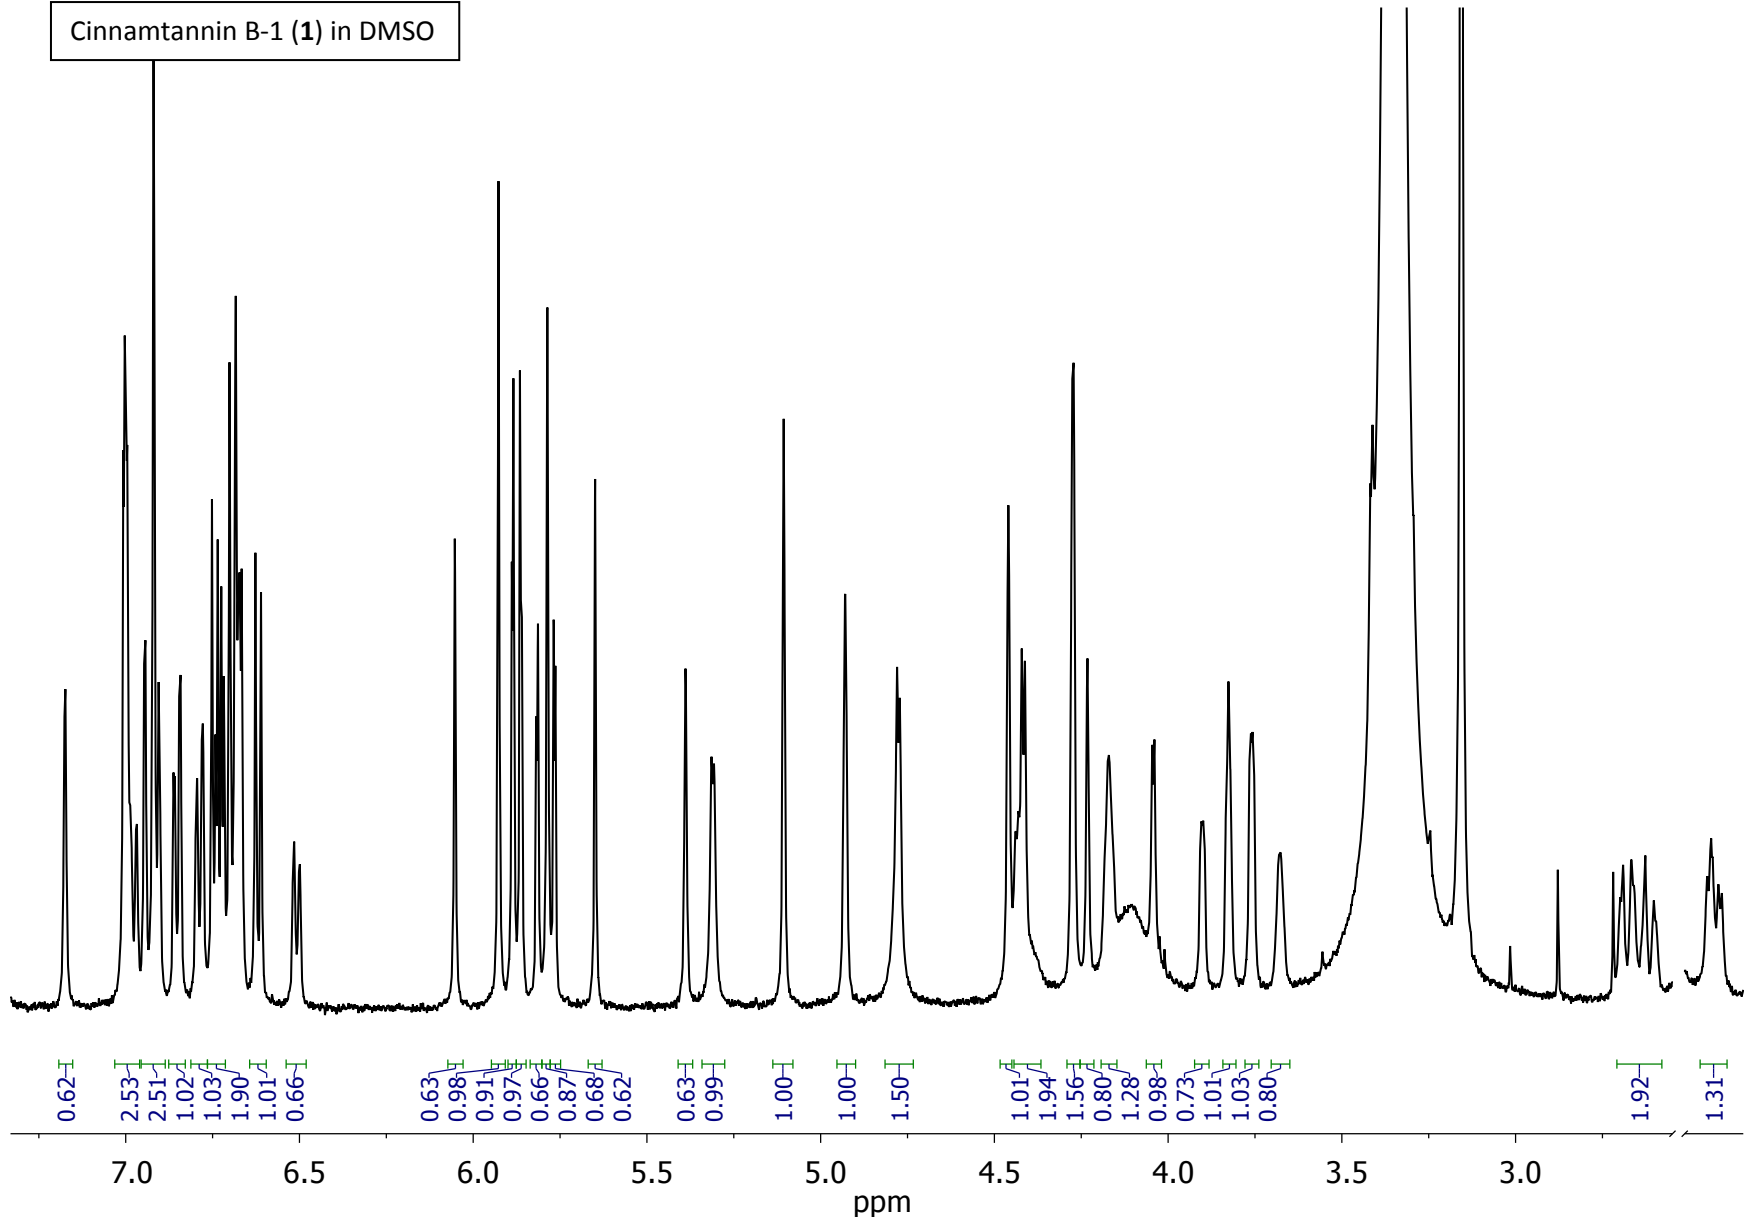

Cinnamtannin B-1 (1) in acetone-d<sub>6</sub>

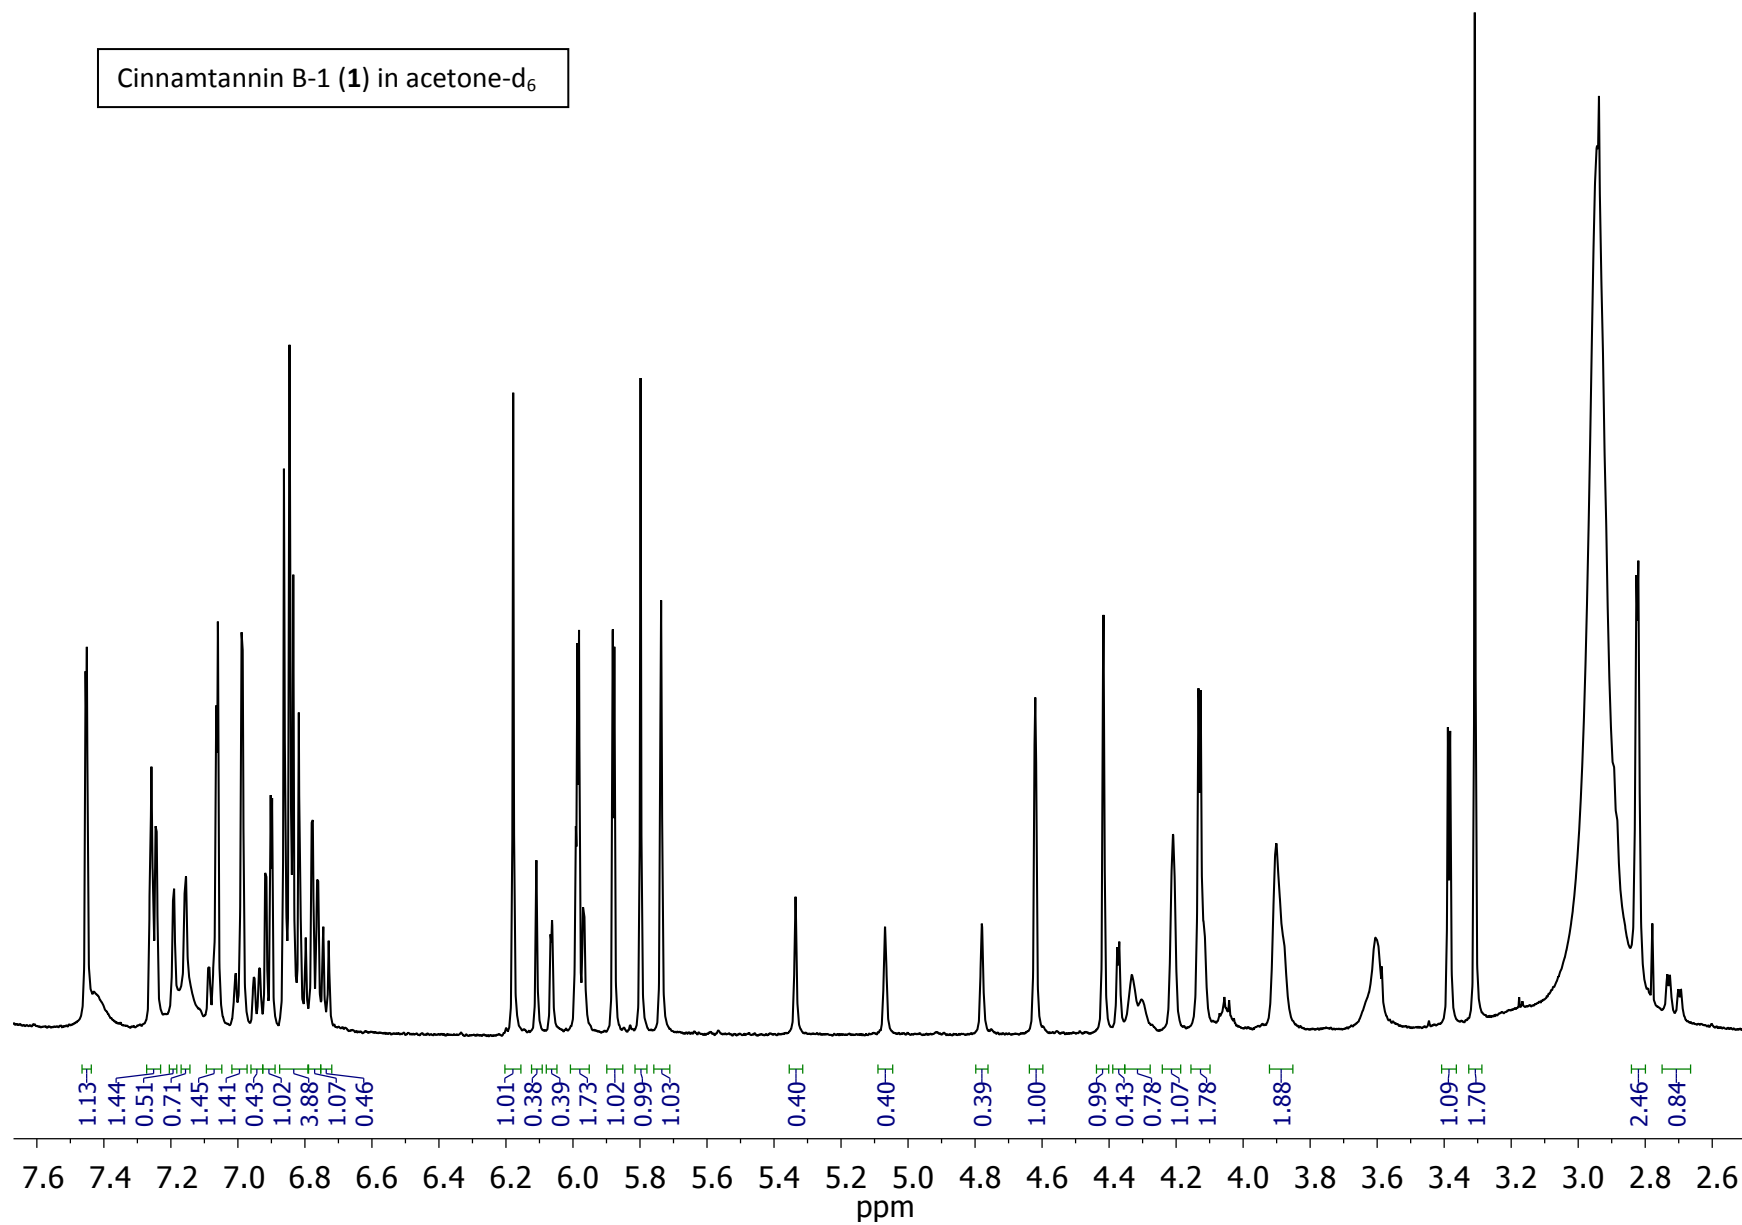

Cinnamtannin B-1 (1) in pyridine-d<sub>5</sub>

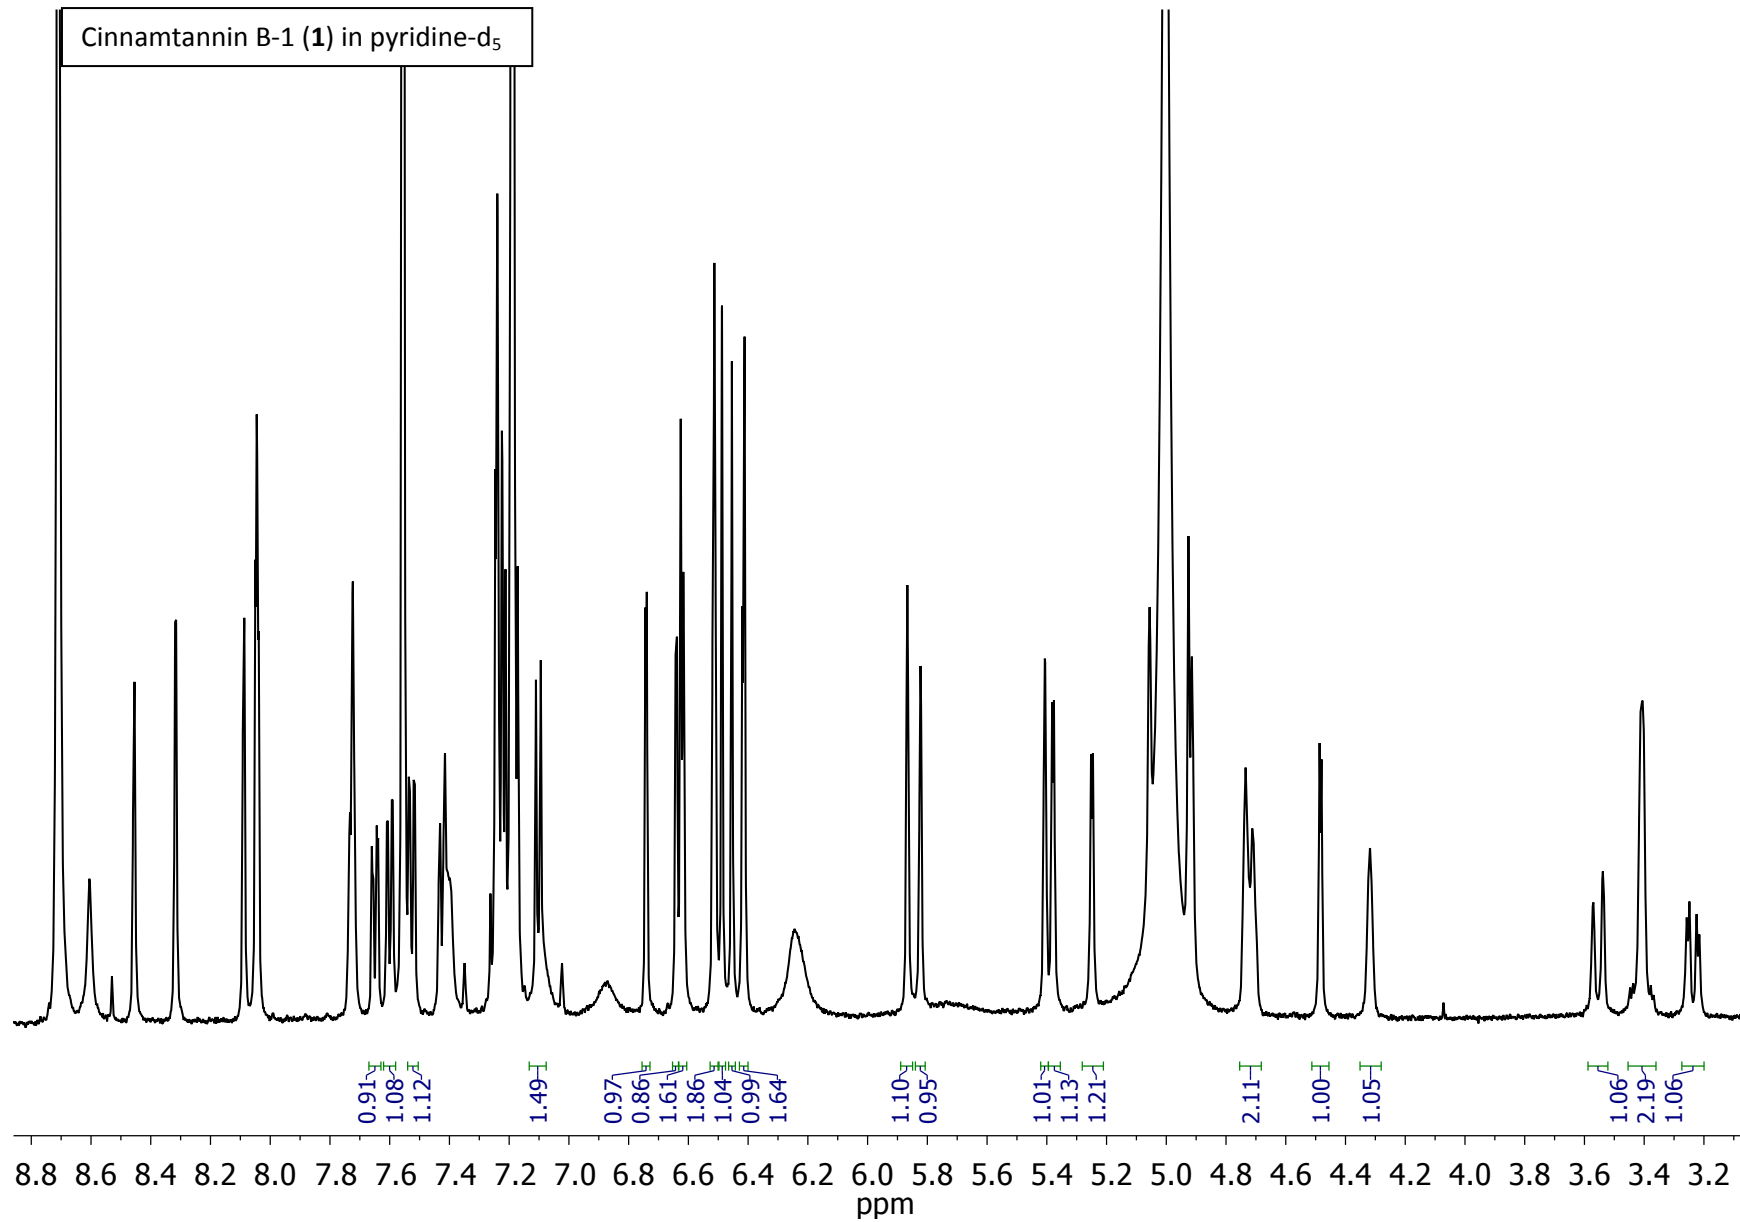

Cinnamtannin D-1 (2) in MeOD

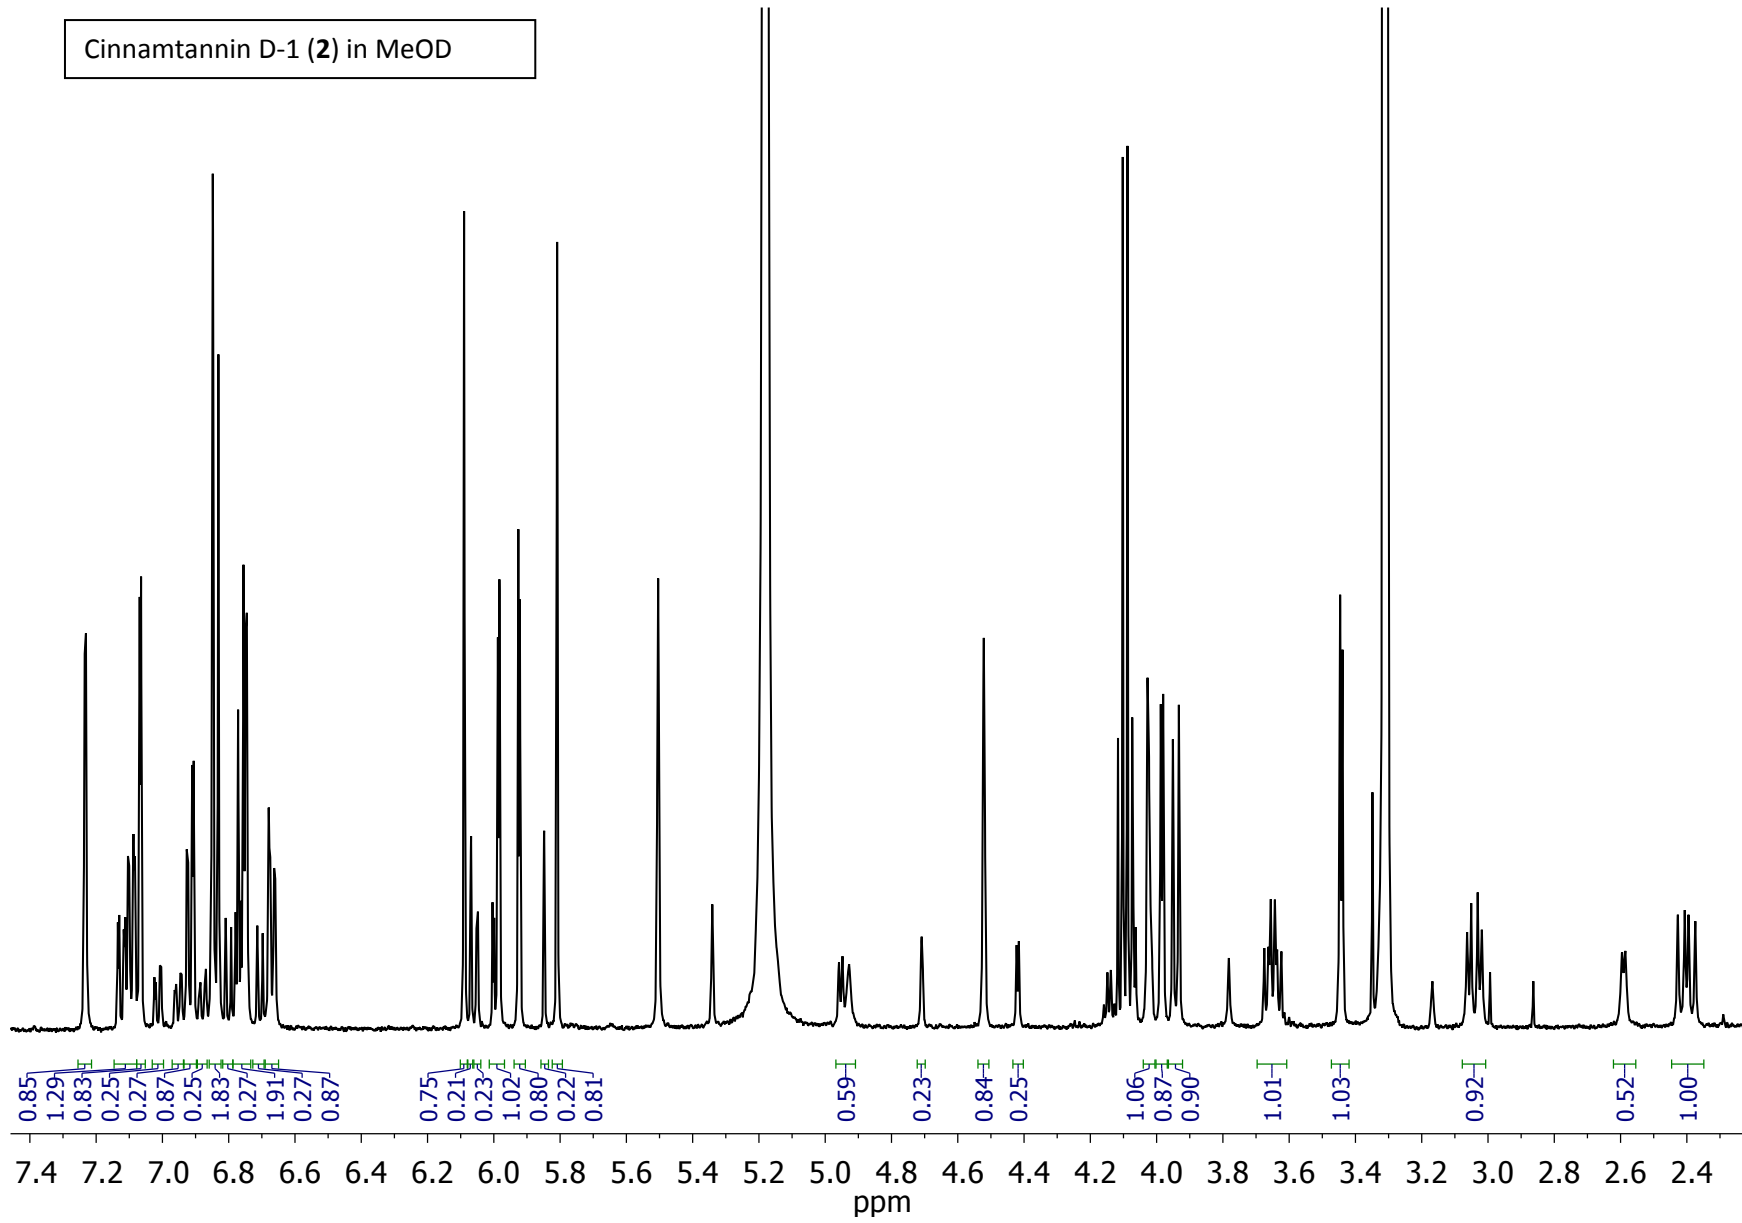

Cinnamtannin D-1 (2) in DMSO

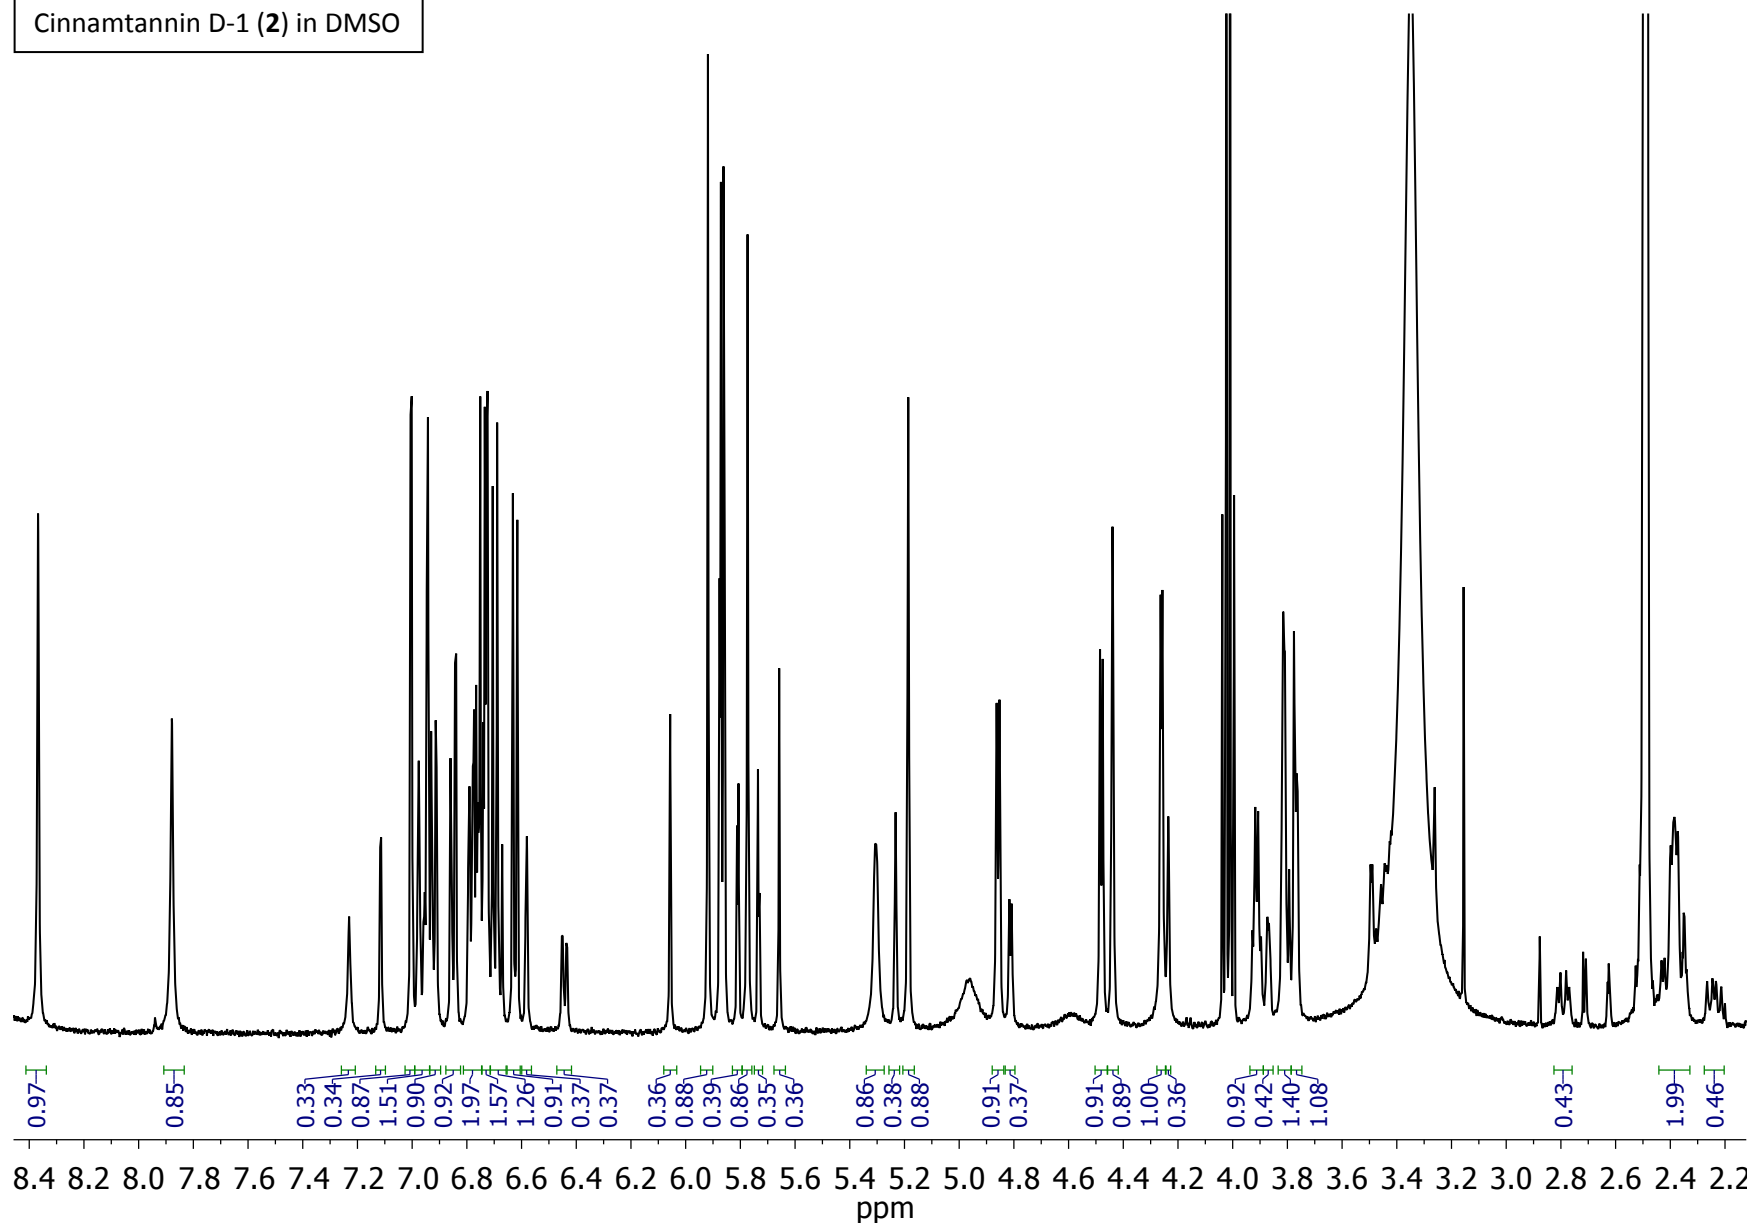



Cinnamtannin D-1 (**2**) in acetone-d<sub>6</sub>

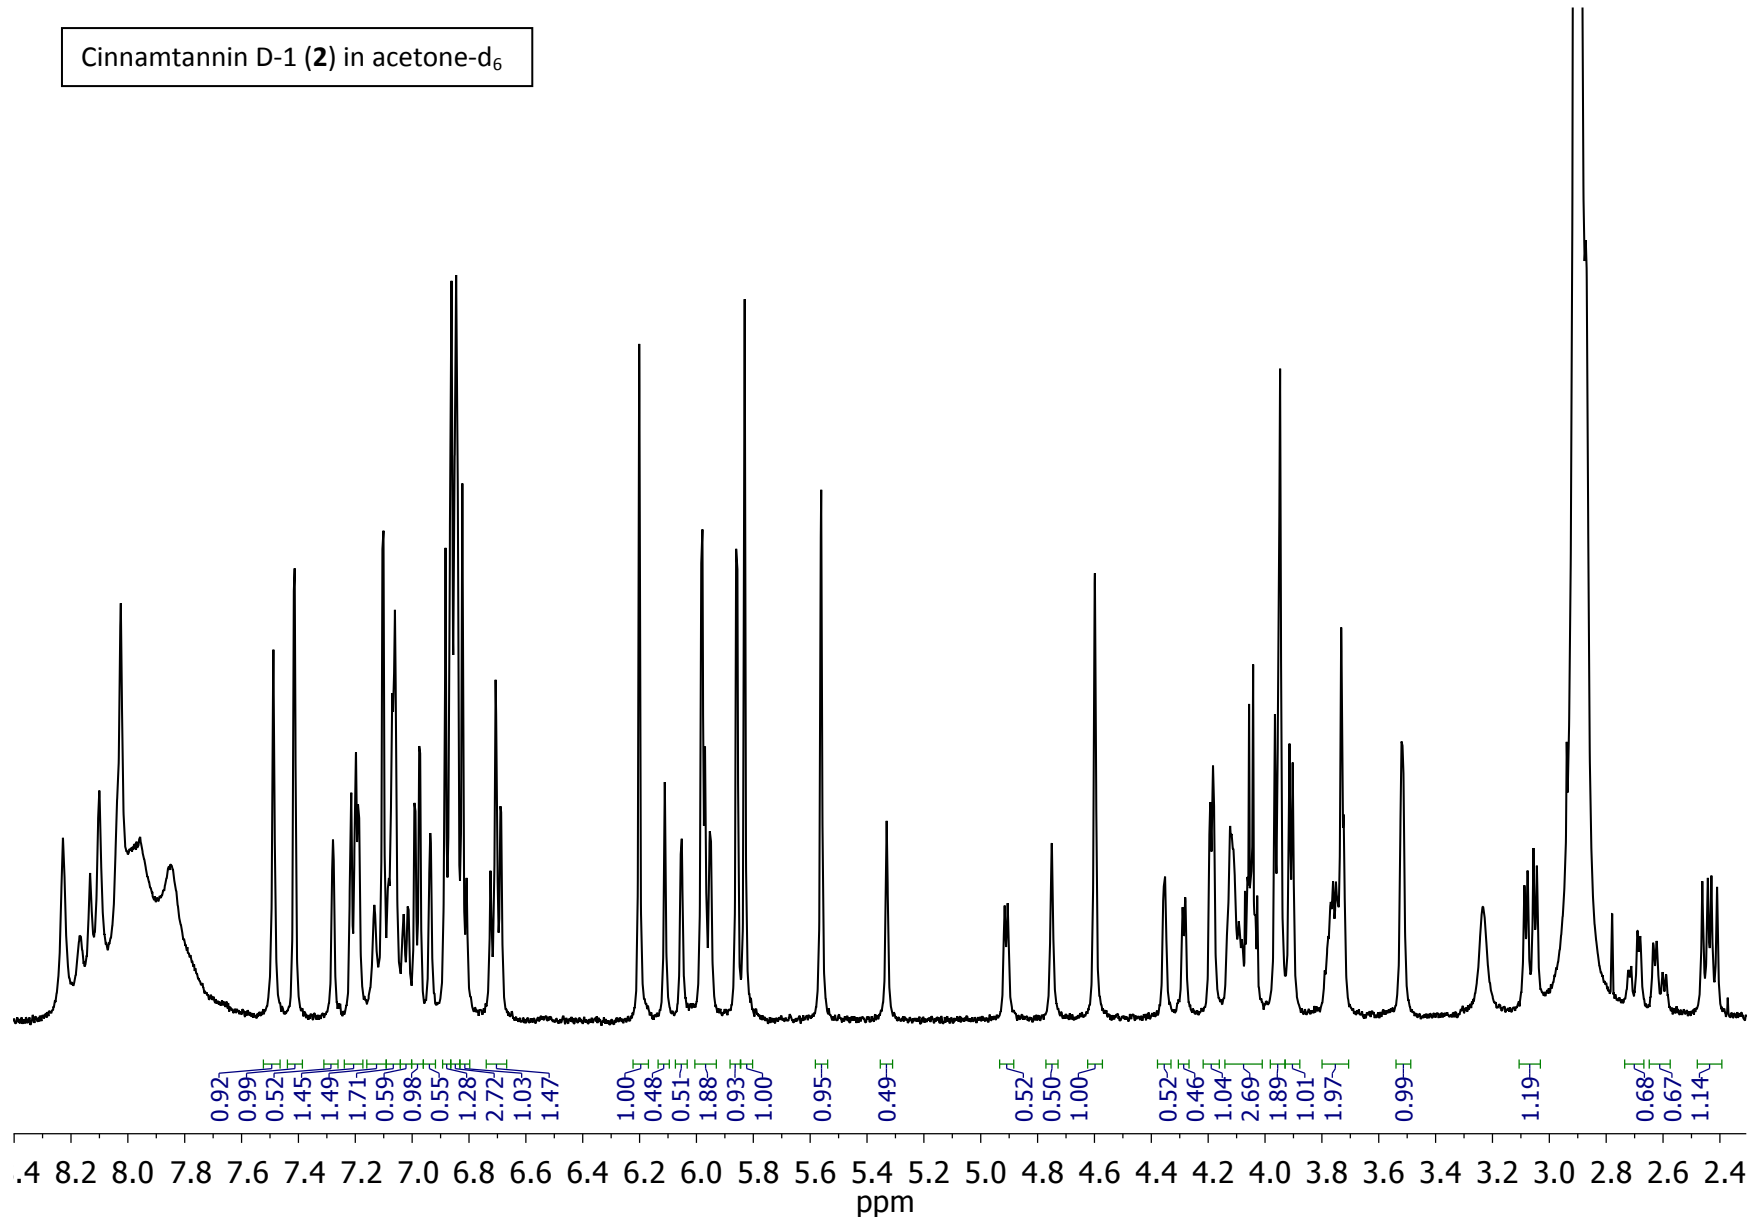

Cinnamtannin D-1 (2) in pyridine-d<sub>5</sub>

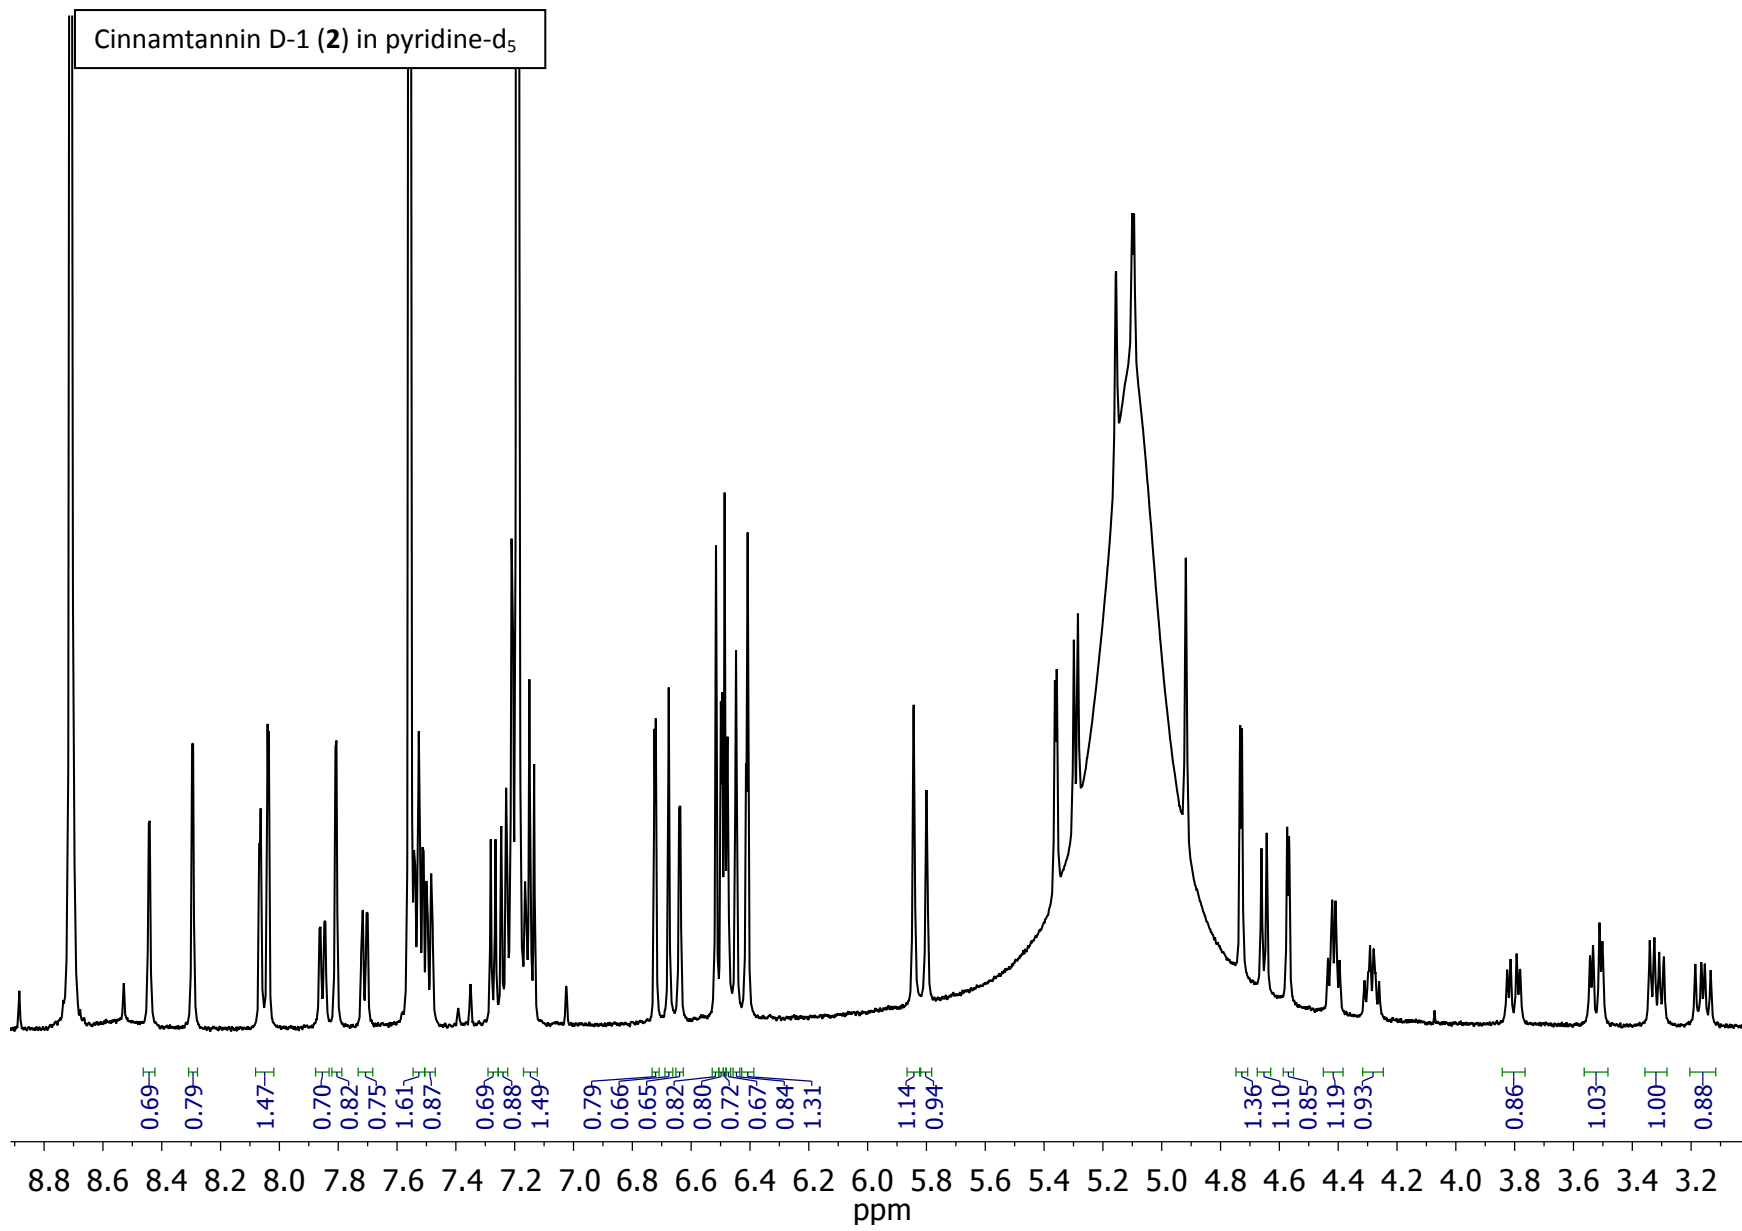

Aesculitannin B (3) in MeOD

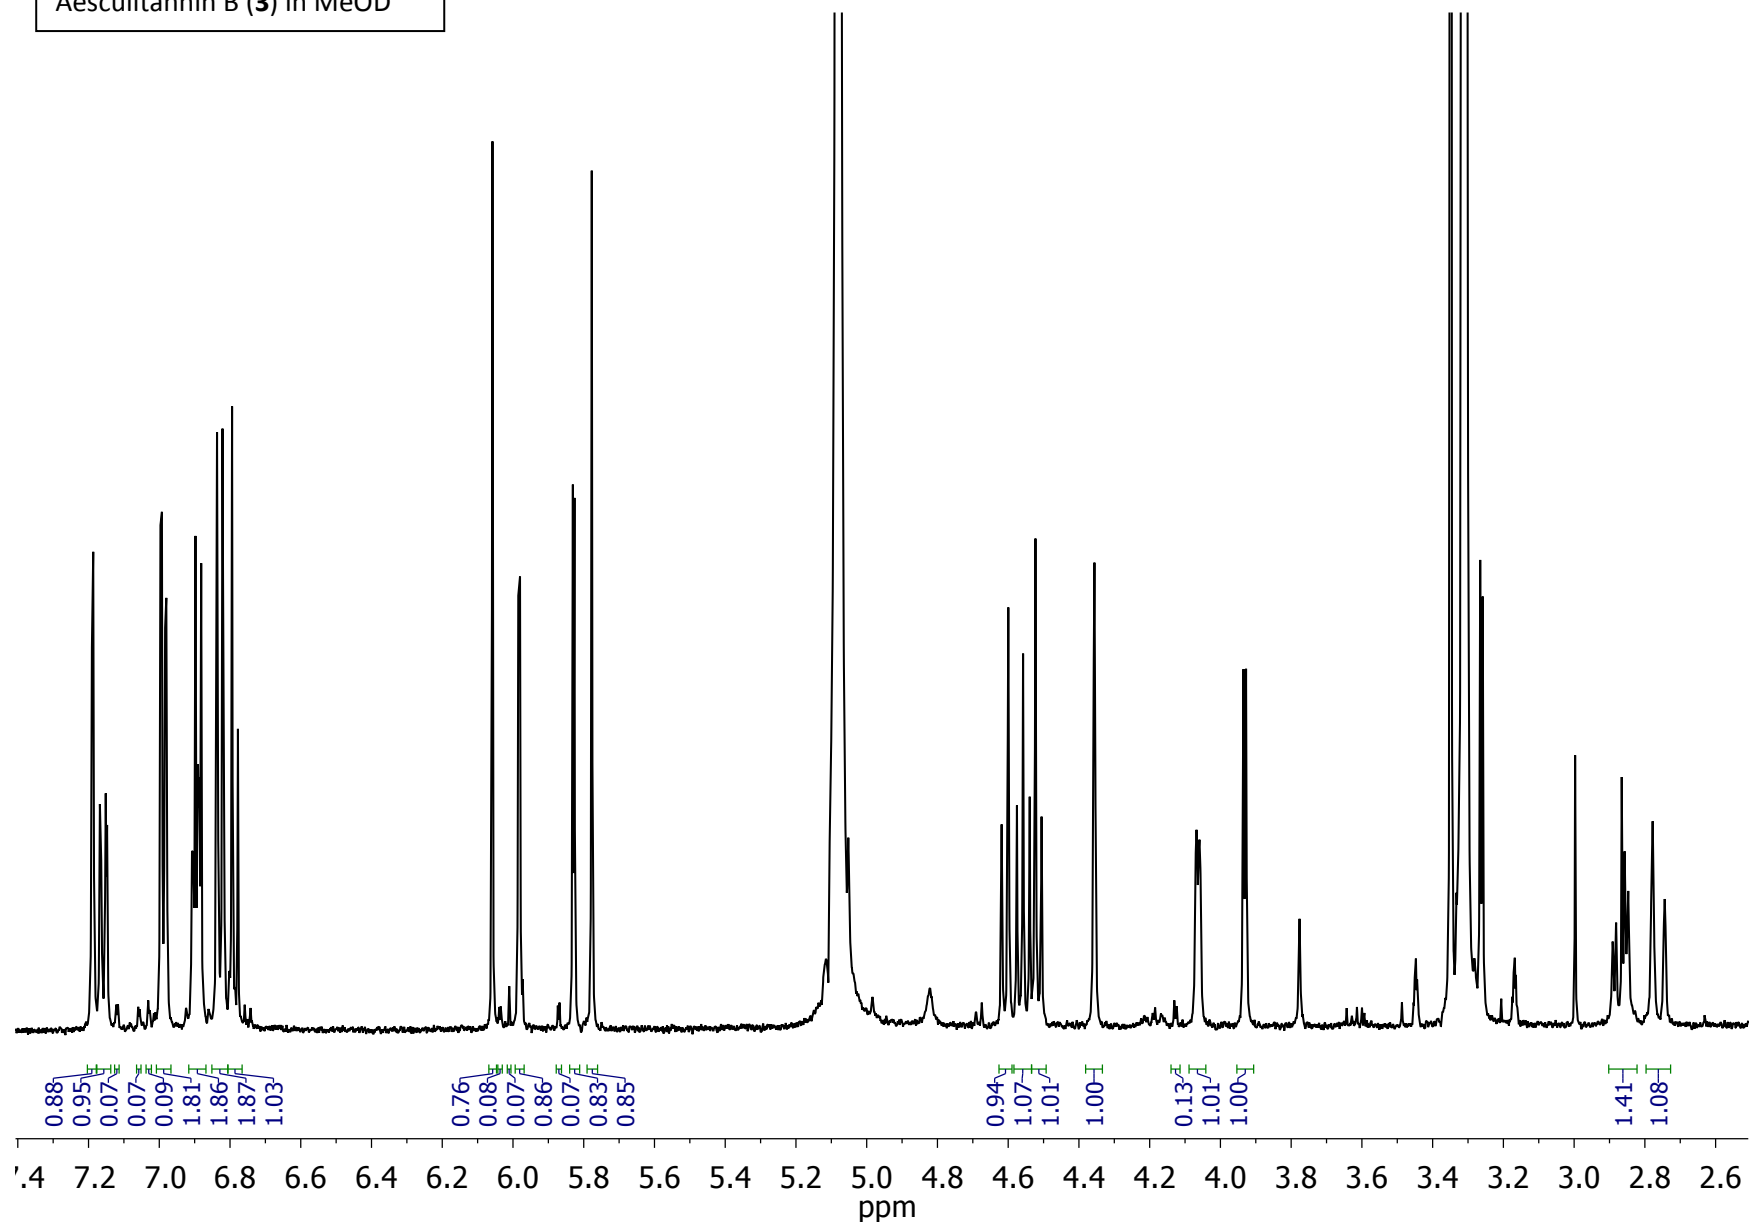

Aesculitannin B (3) in DMSO

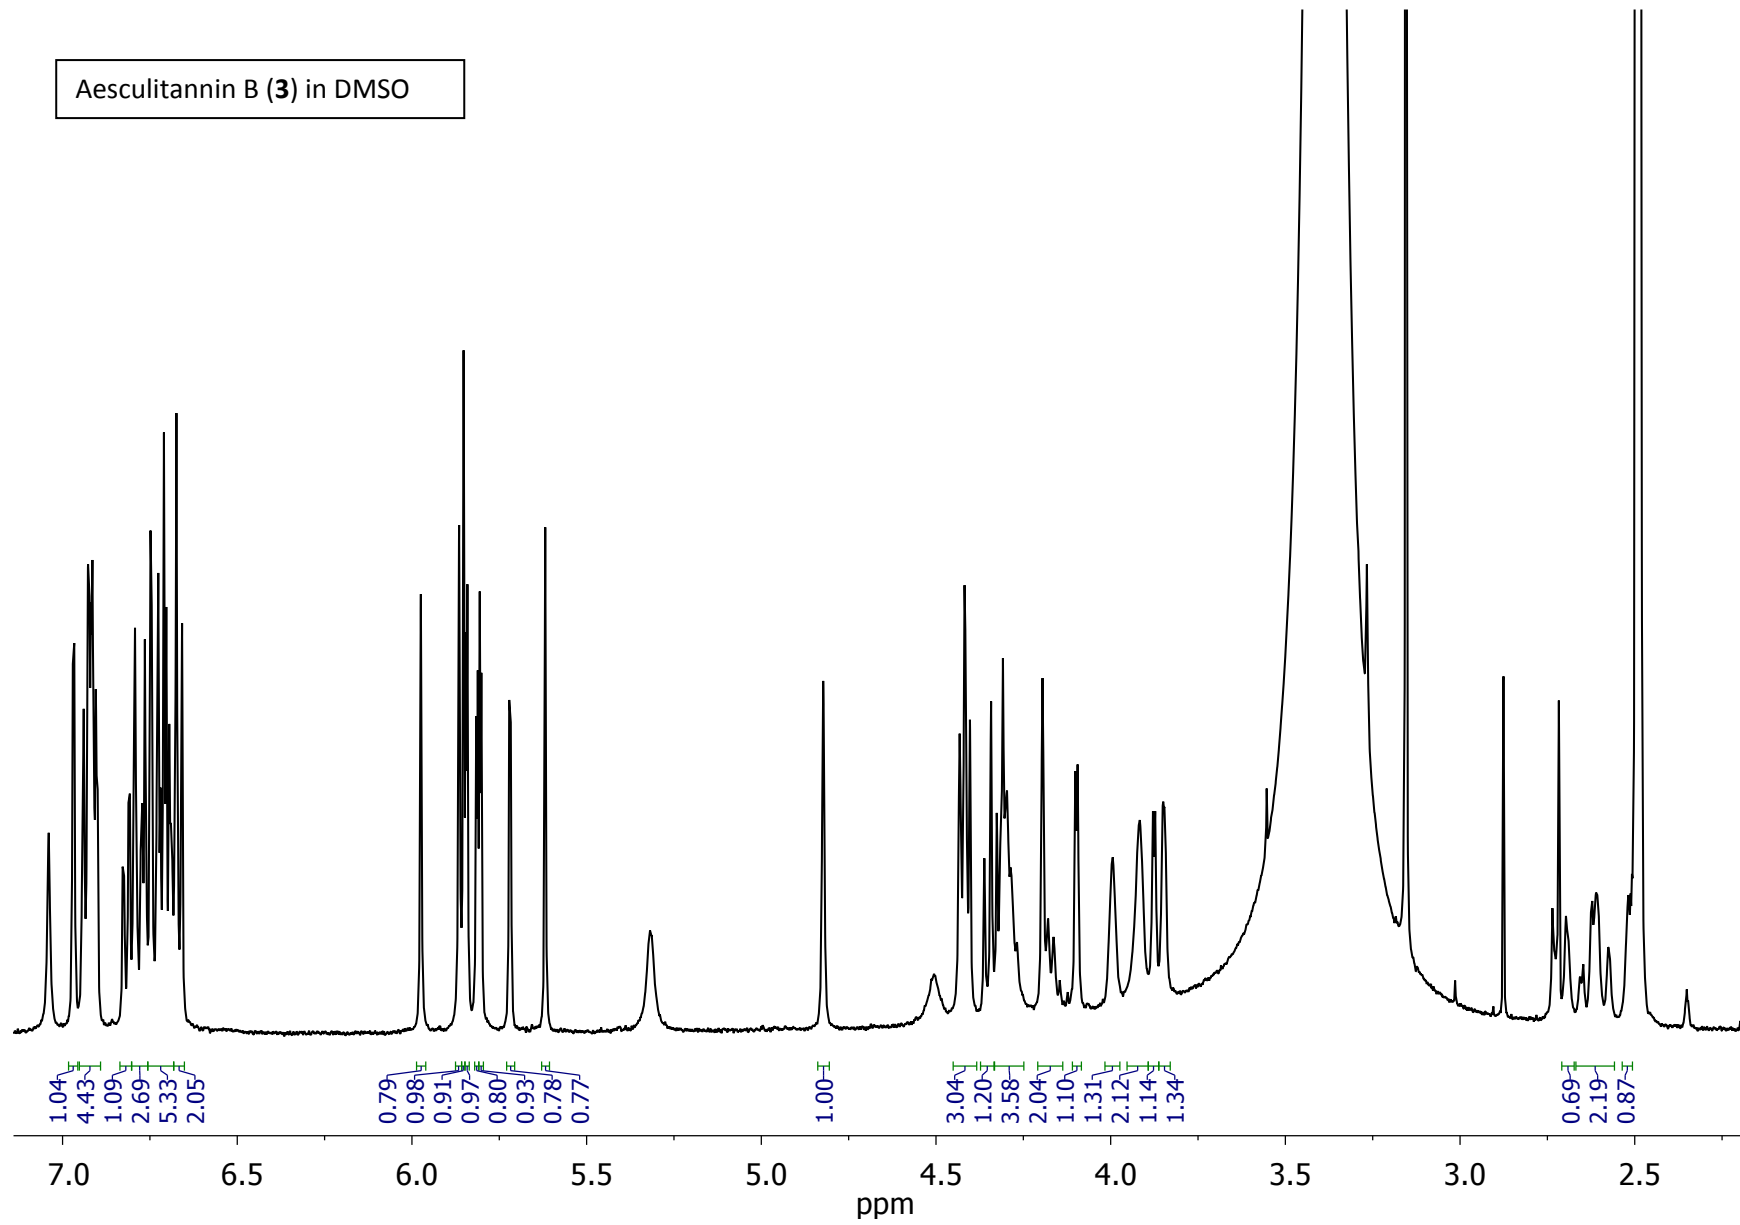

Aesculitannin B (3) in acetone-d<sub>6</sub>

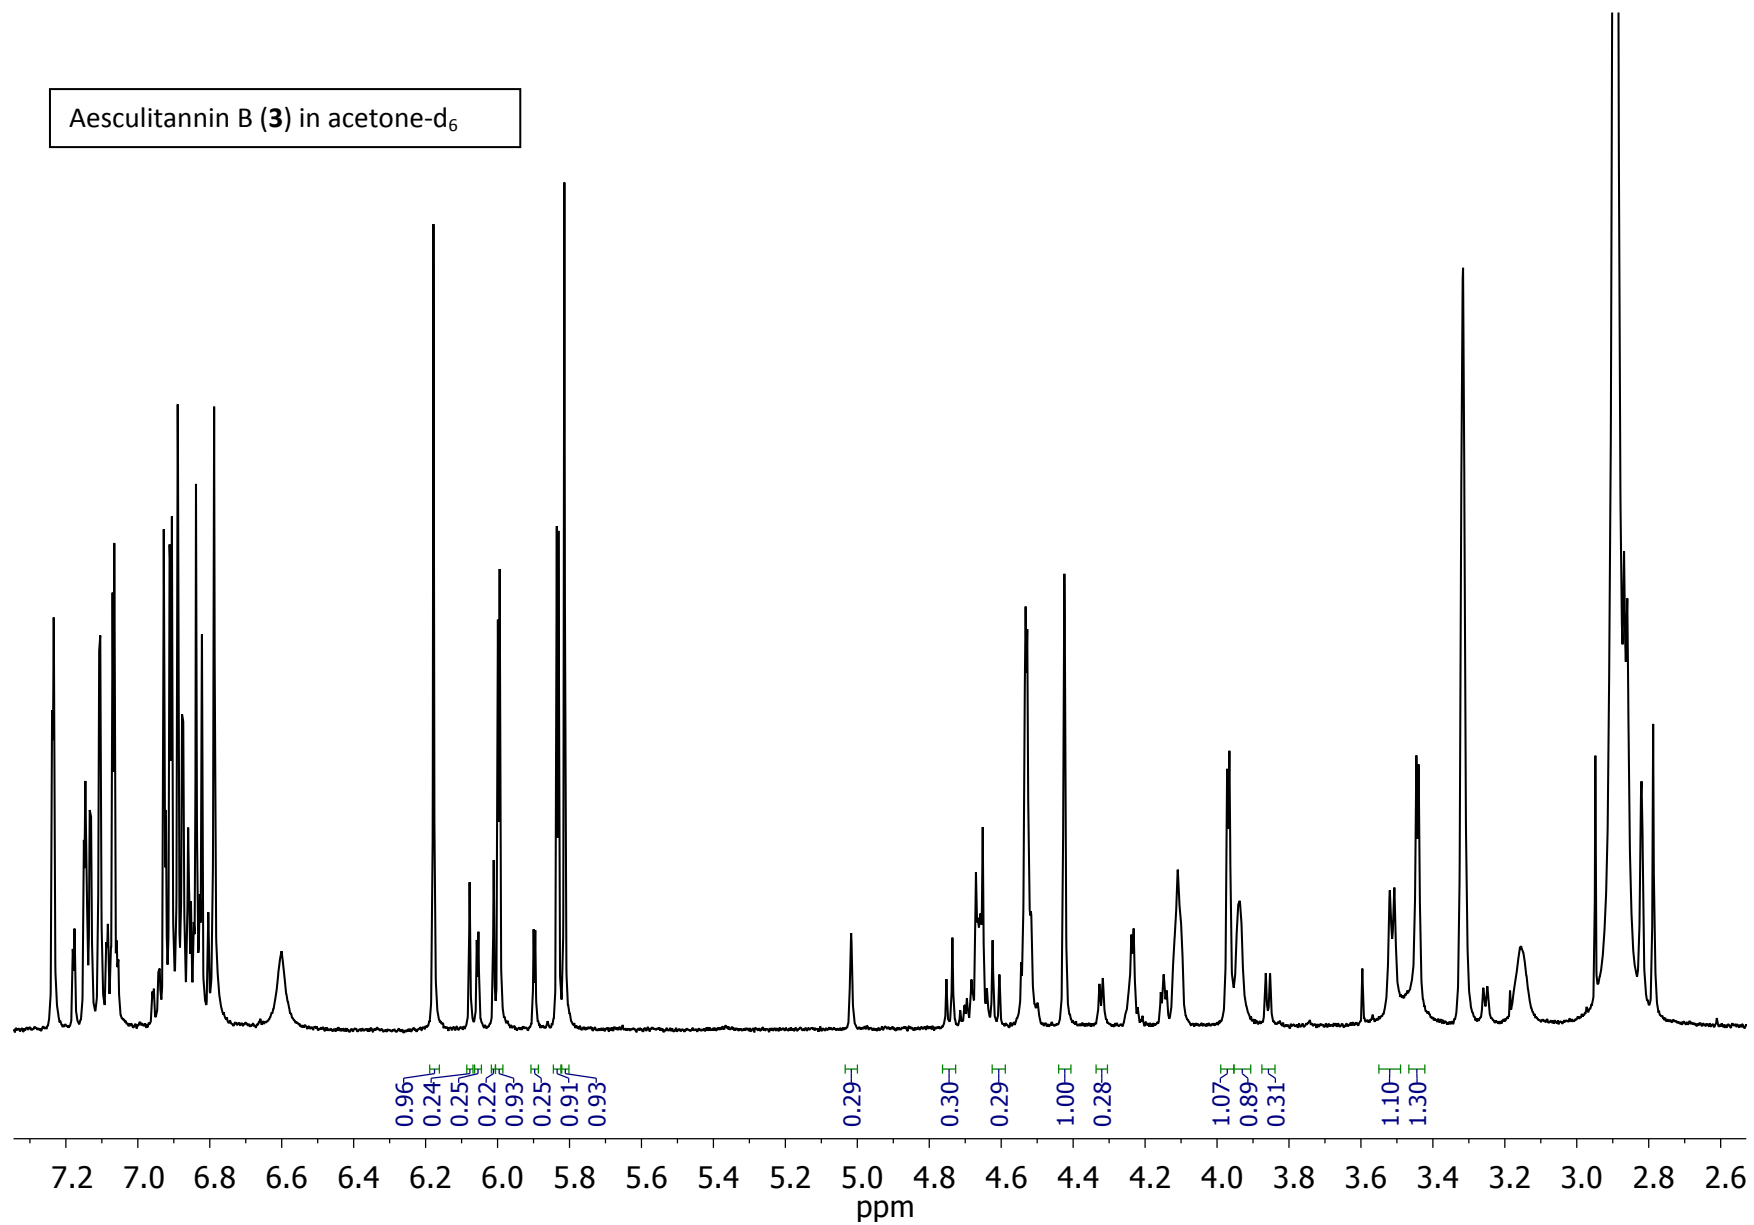

Aesculitannin B (3) in pyridine-d<sub>5</sub>

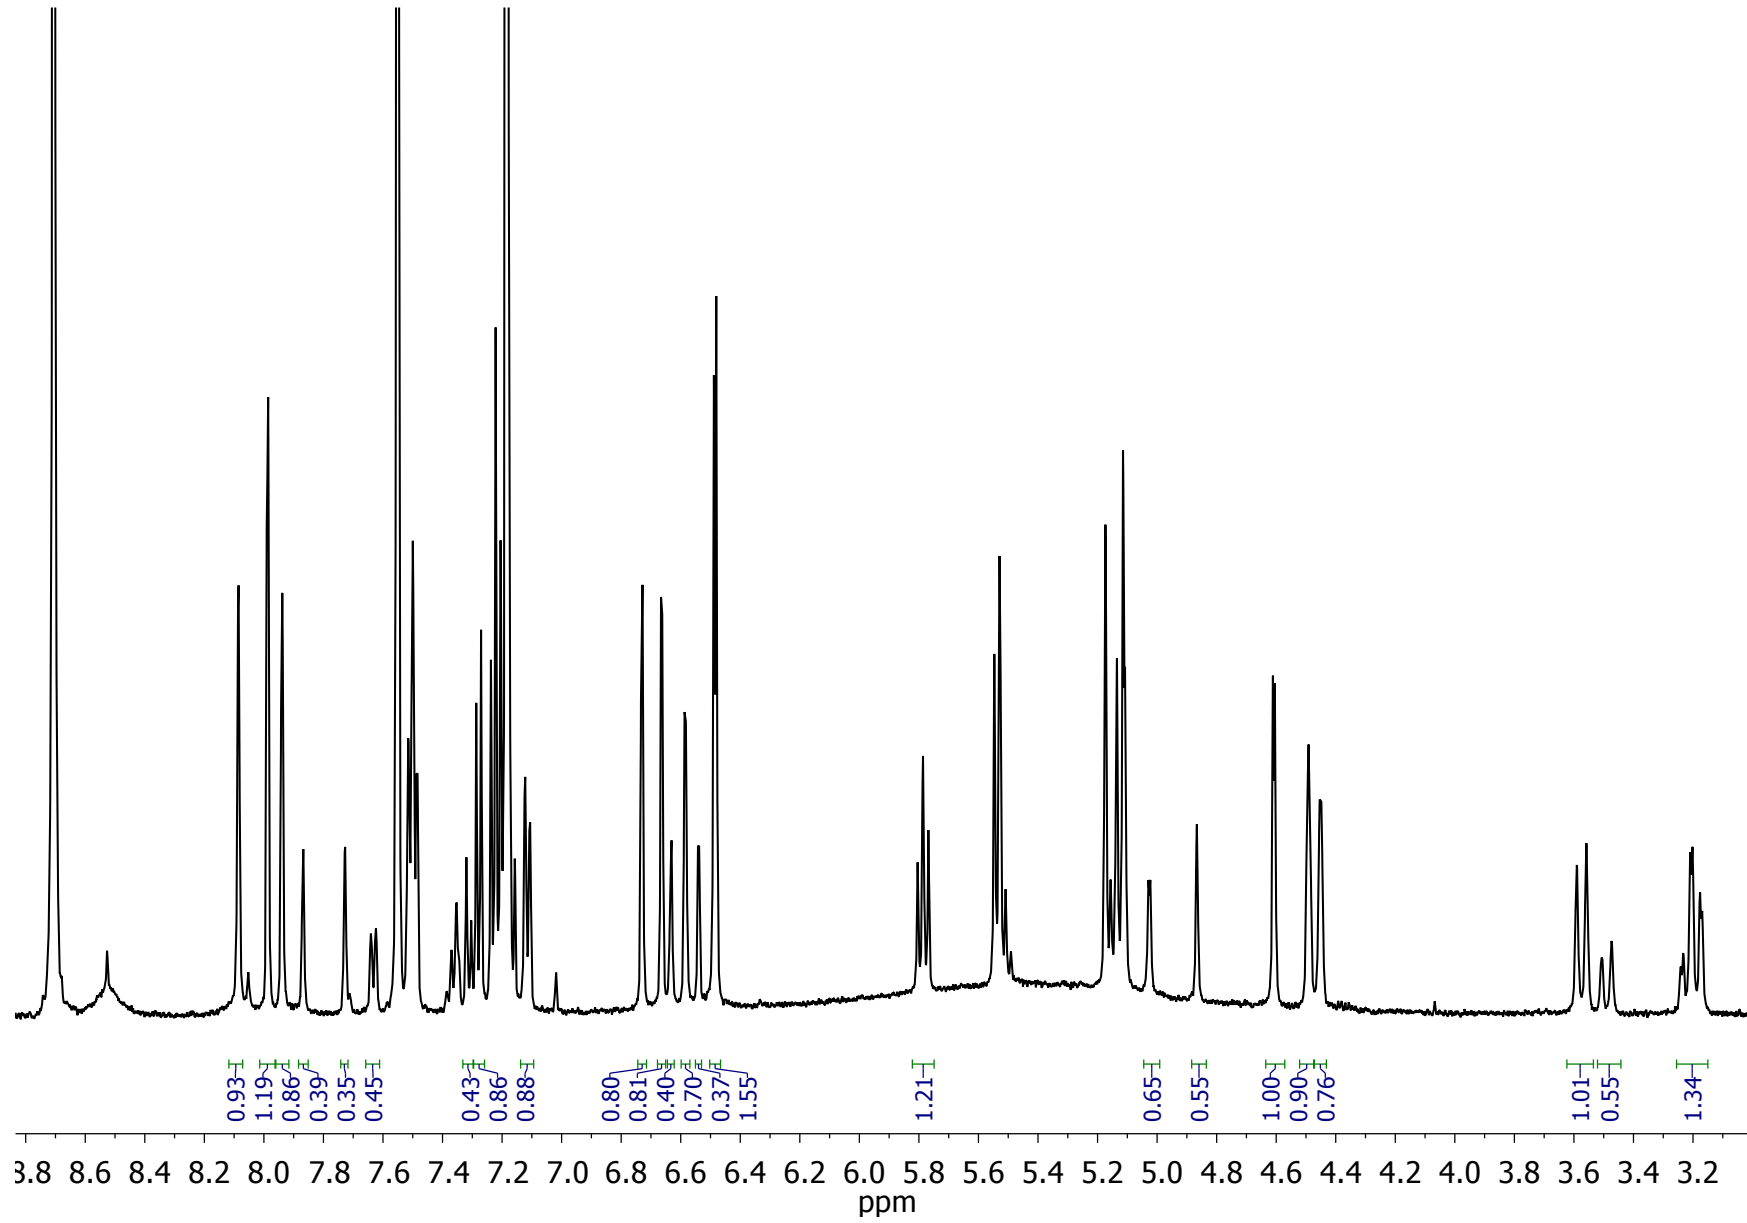

Lindetannin (4) in MeOD

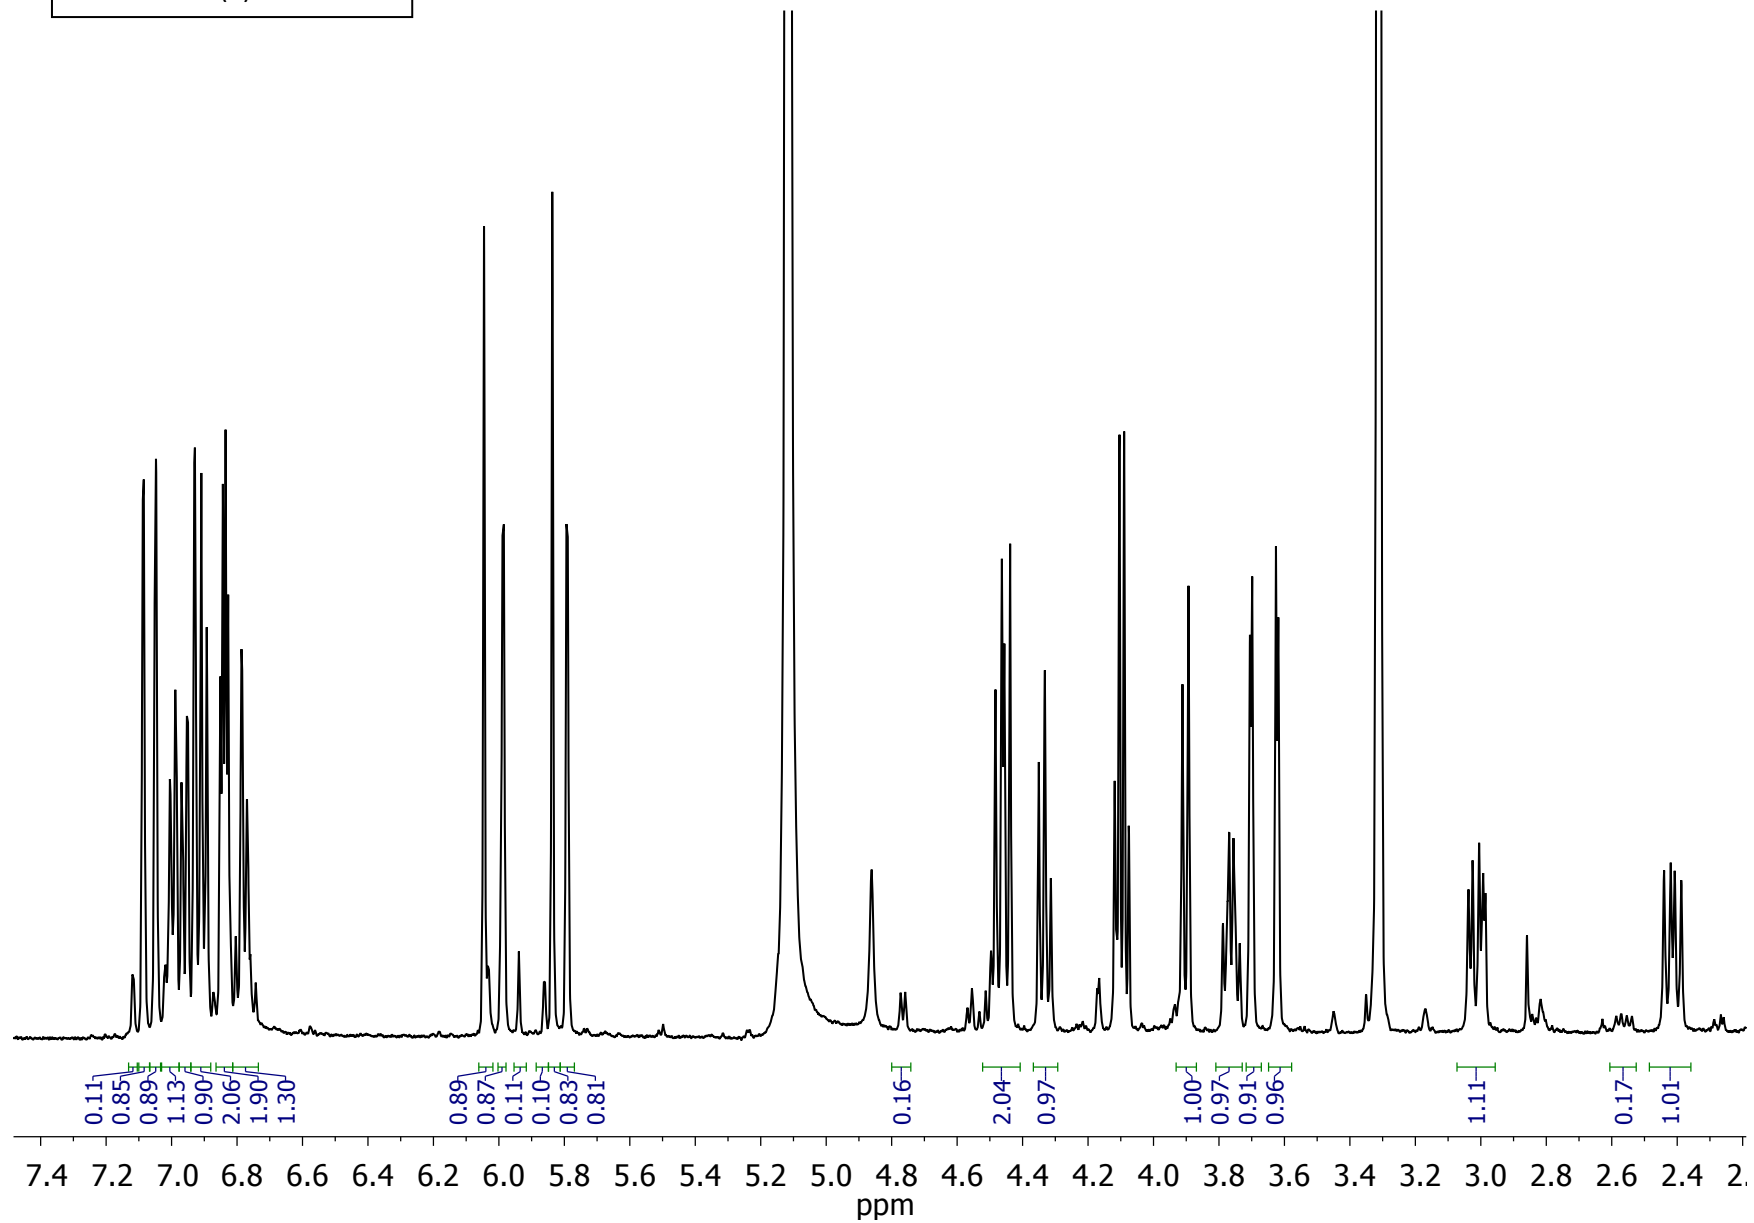

Lindetannin (4) in DMSO

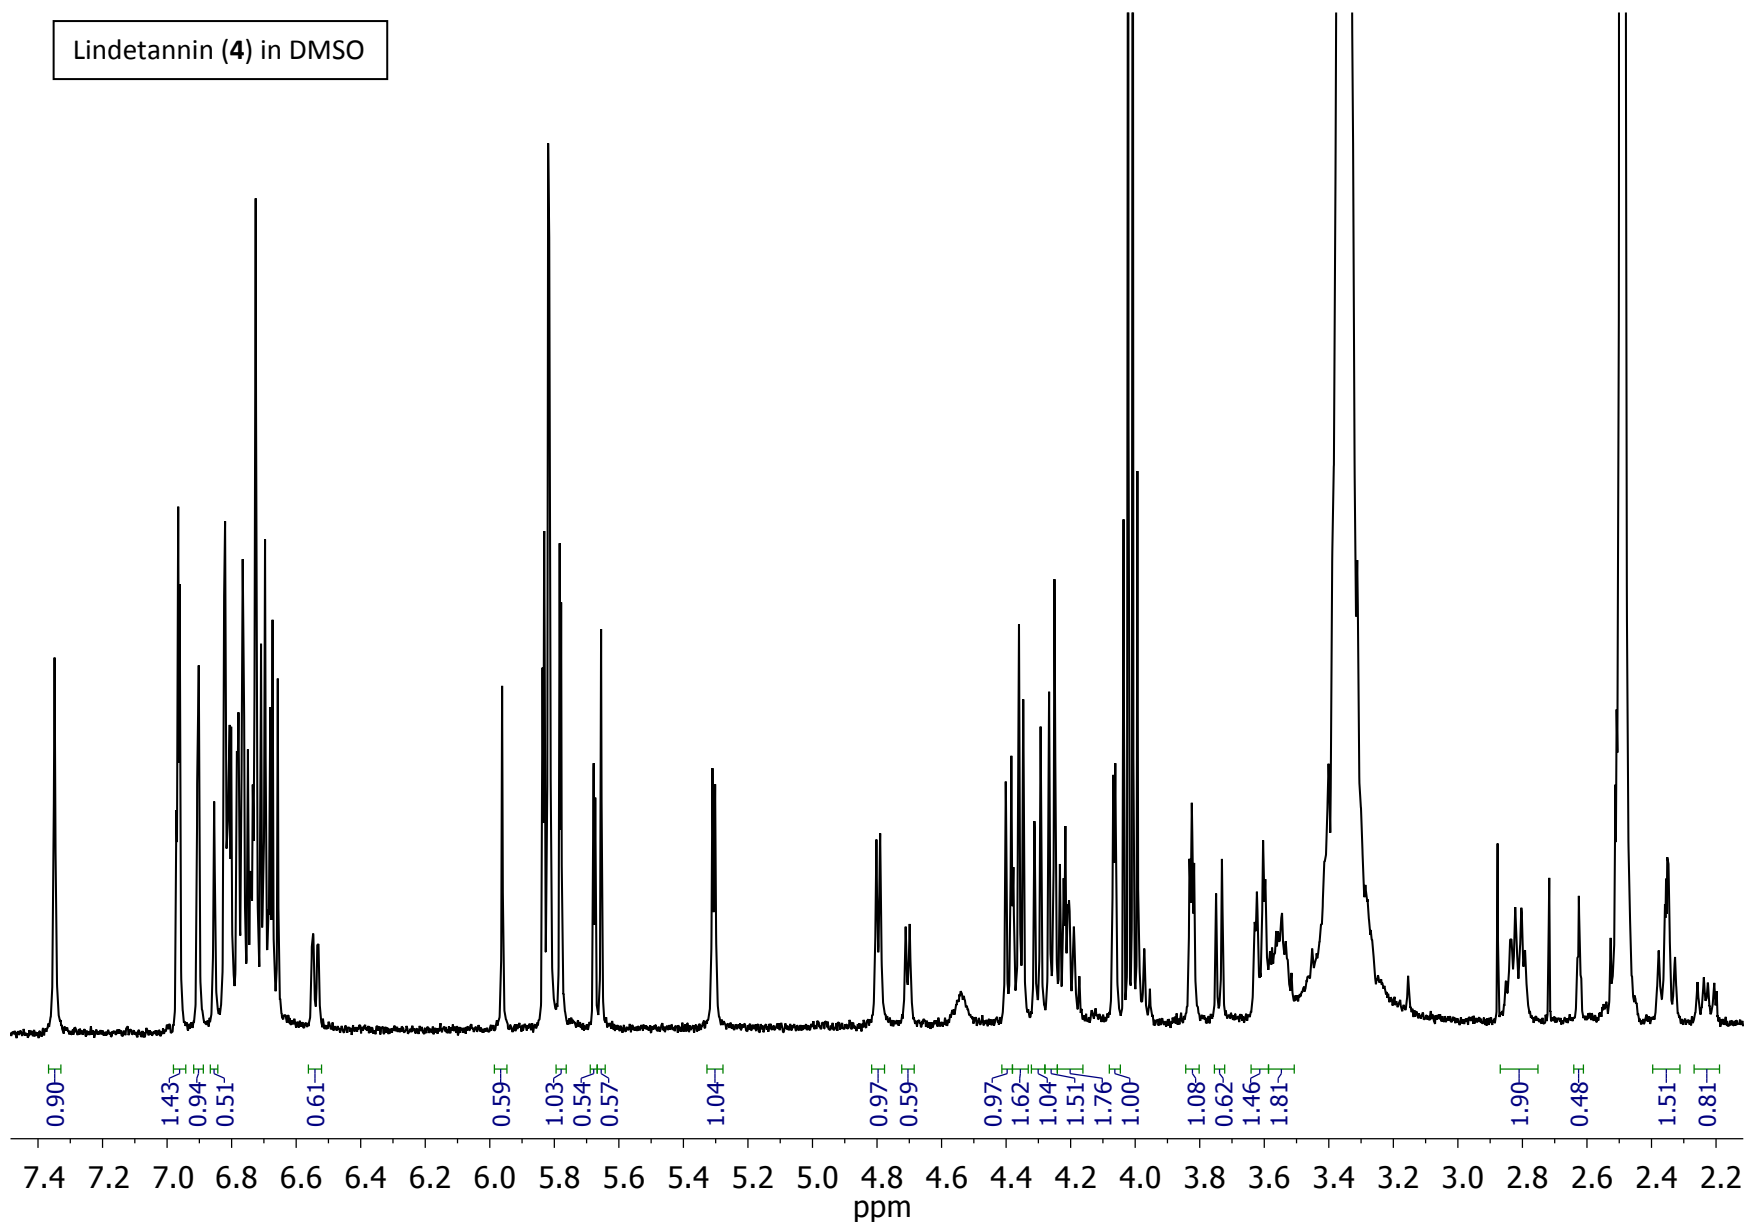



Lindetannin (4) in acetone-d<sub>6</sub>

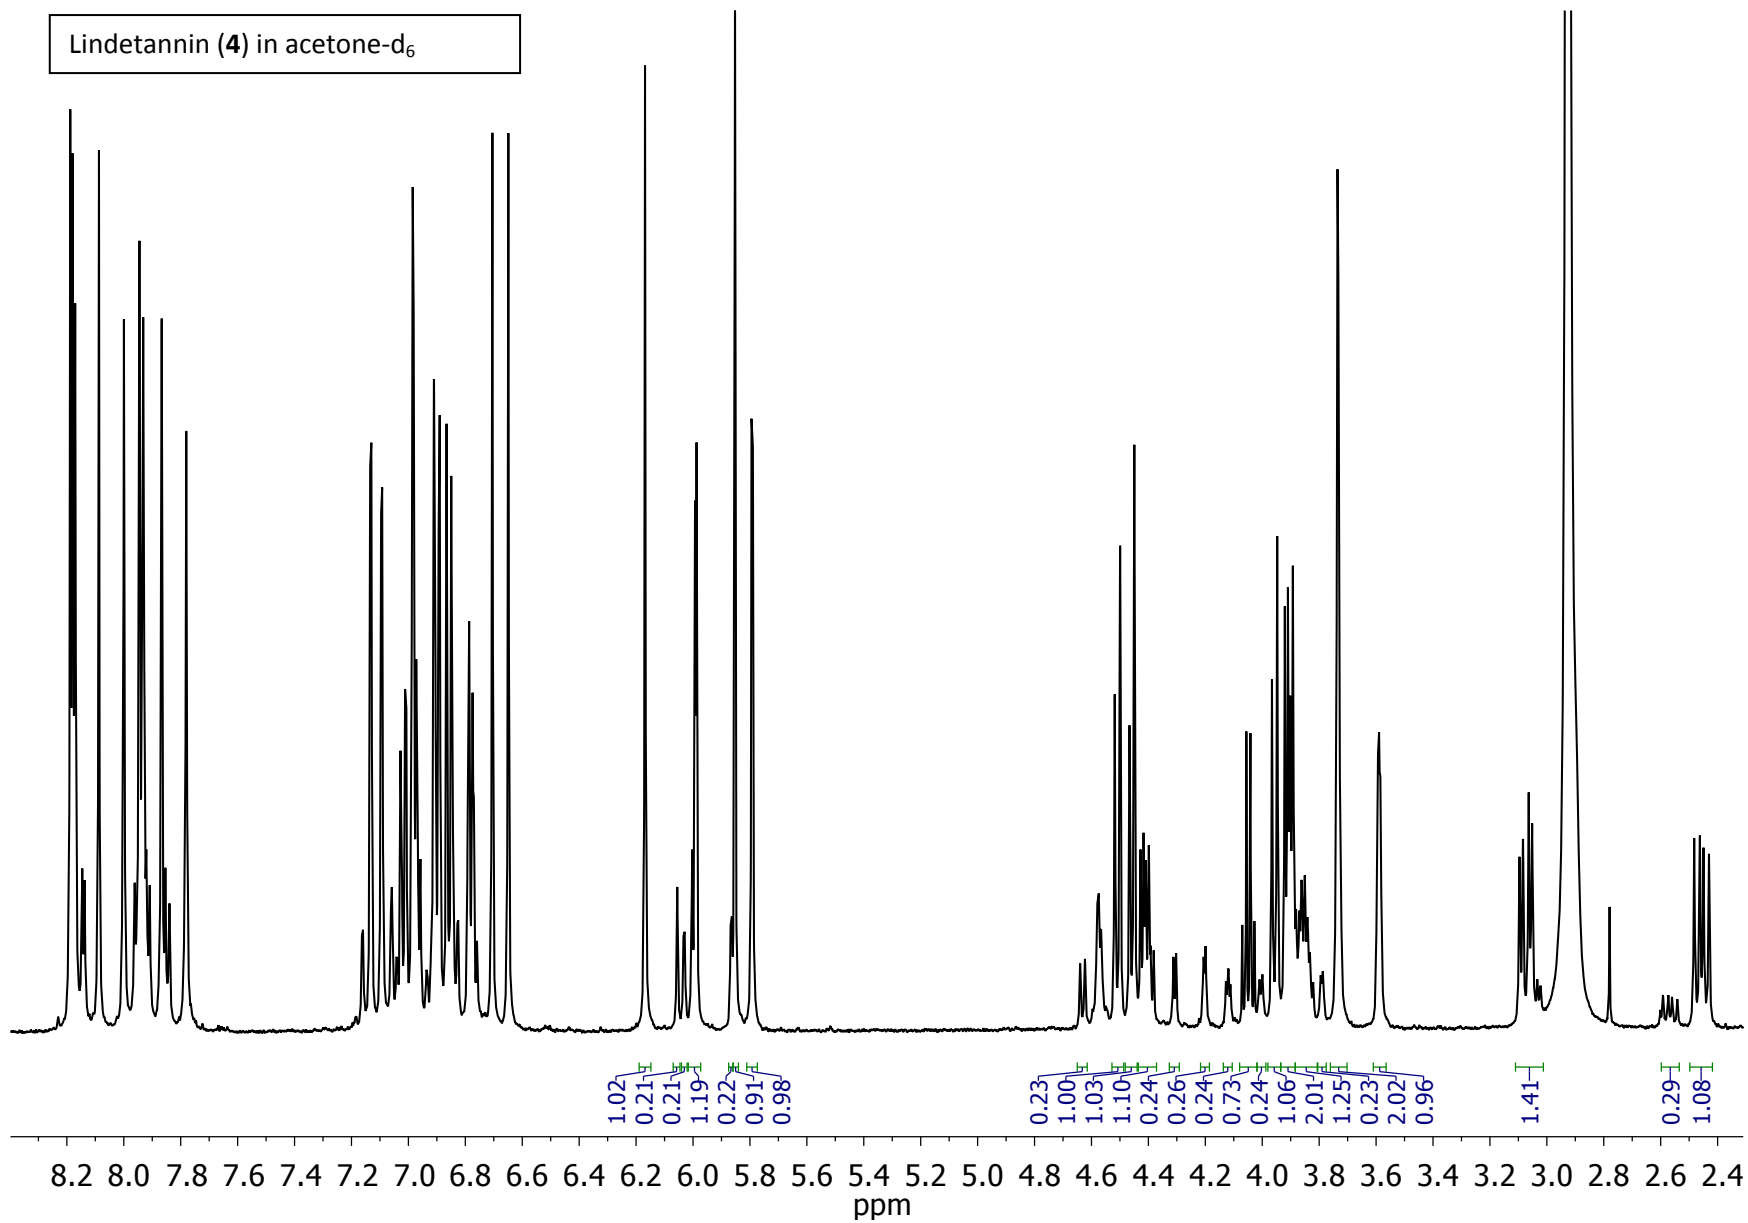

Lindetannin (**4**) in pyridine-d<sub>5</sub>

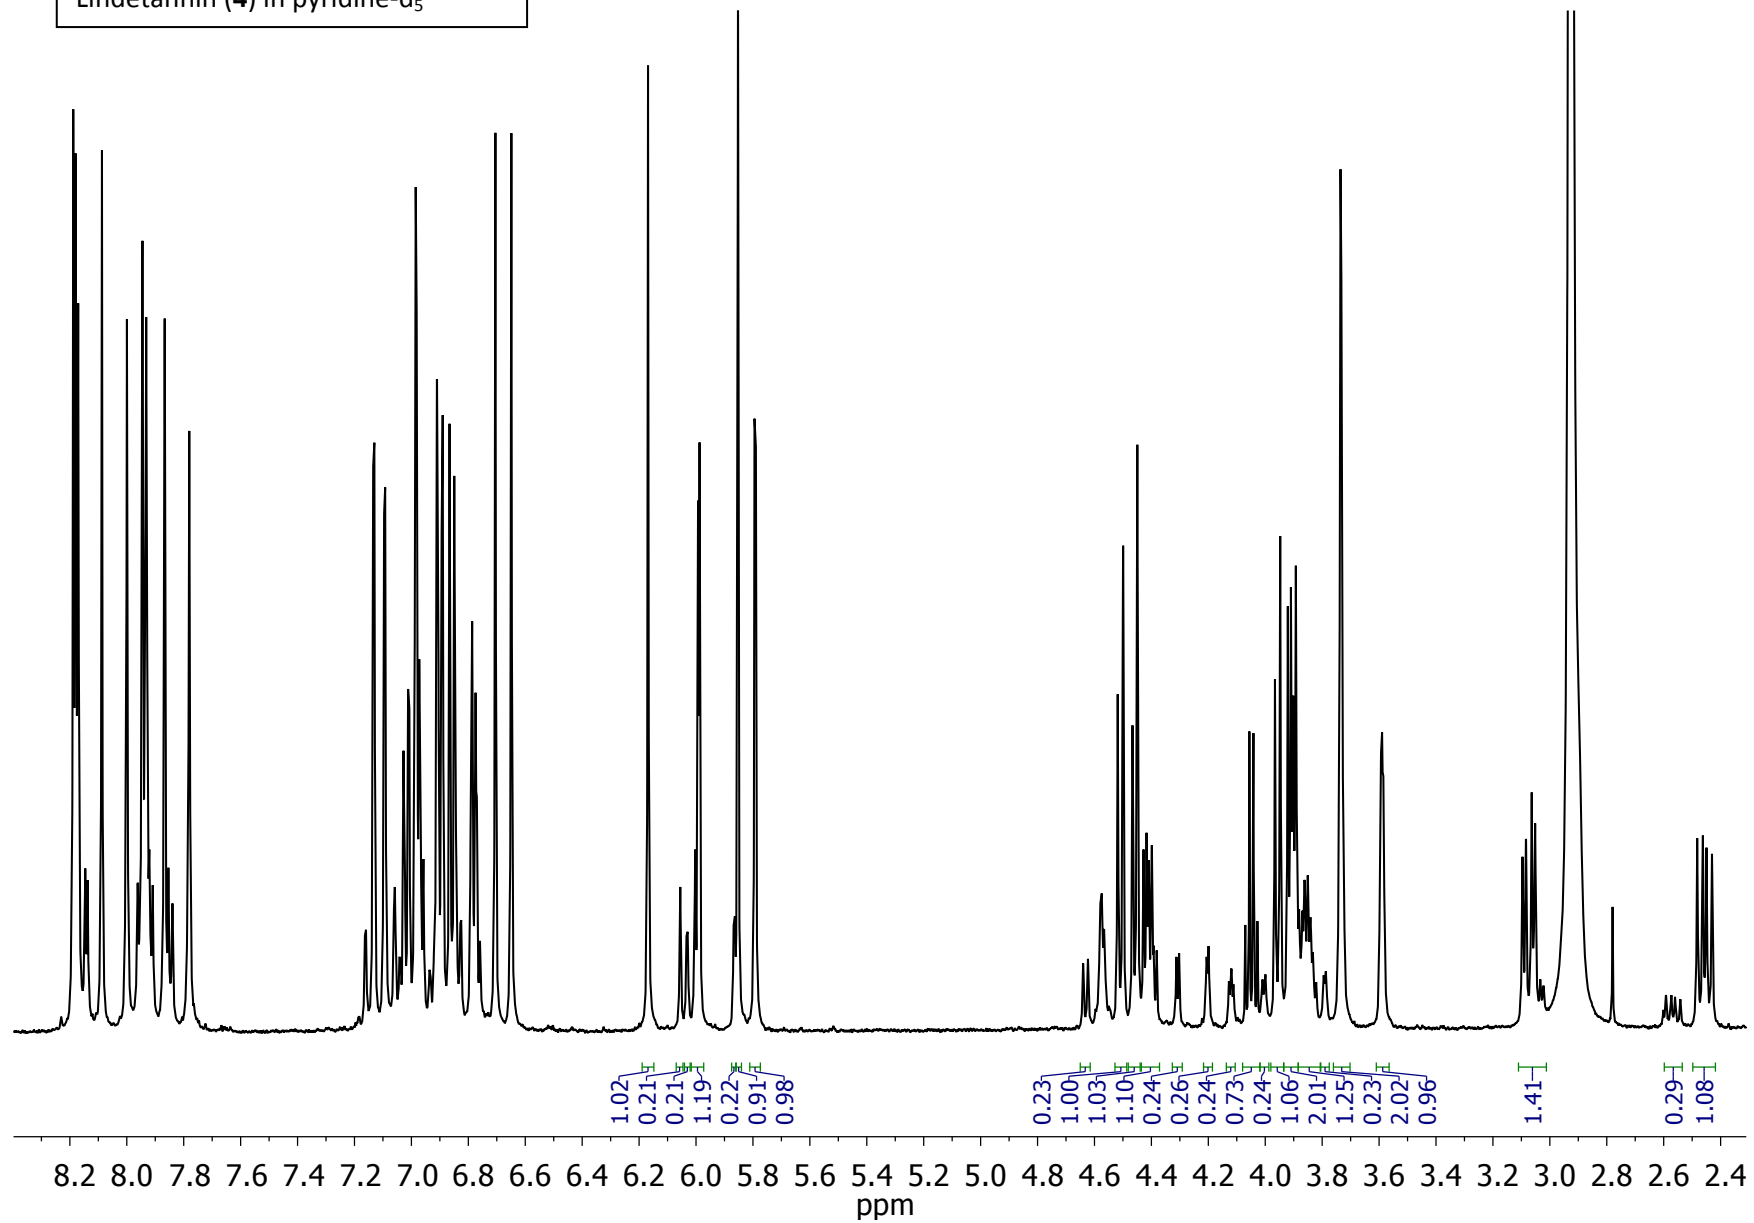

**Table S11.** Internal energies (E) and Gibbs free energies ( $\Delta G$ ) differences between the two lowest-energy conformers of **1-4** (in kcal/mol) calculated with two functionals: B3LYP and M062X and 6-31G(d,p) basis set.

|     | <b>B3LYP</b> |      |            | <b>M062X</b> |      |            |
|-----|--------------|------|------------|--------------|------|------------|
|     | $\phi$ [°]   | E    | $\Delta G$ | $\phi$ [°]   | E    | $\Delta G$ |
| (1) | -91.0        | 0.2  | 0          | -90.3        | 3.6  | 1.7        |
|     | +89.8        | 0    | 1.7        | +90.7        | 0    | 0          |
| (2) | -95.6        | 2.3  | 0          | -88.2        | 4.9  | 1.9        |
|     | +91.9        | 0    | 2.3        | +92.5        | 0    | 0          |
| (3) | -100.4       | 5.3  | 2.3        | -99.1        | 7.0  | 5.1        |
|     | +85.8        | 0    | 0          | +84.4        | 0    | 0          |
| (4) | -102.5       | 15.1 | 0          | -99.9        | 21.4 | 17.5       |
|     | +80.0        | 0    | 7.8        | +80.1        | 0    | 0          |

**Signal assignment for minor and major rotamers of 1-4 in MeOD and DMSO-d<sub>6</sub>**

***Cinnamtannin B1 (1)***. Major rotamer in MeOD (integral 1.0): <sup>1</sup>H NMR (500 MHz, *T* = 270K): δ 2.83 (br, 2H, H-4''), 3.25 (d, 1H, <sup>3</sup>*J* = 3.4Hz, H-3), 3.85 (br s, 1H, H-3''), 4.08 (s, 1H, H-3'), 4.13 (d, 1H, <sup>3</sup>*J* = 3.0Hz, H-4), 4.40 (br, 1H, H-2''), 4.56 (s, 1H, H-4'), 5.70 (s, 1H, H-2'), 5.77 (s, 1H, H-6'), 5.96 (d, 1H, <sup>4</sup>*J* = 1.8Hz, H-8), 5.99 (d, 1H, <sup>4</sup>*J* = 1.8Hz, H-6), 6.08 (s, 1H, H-6''), 6.74 (br, 2H, H-15, H-16''), 6.81 (br, 3H, H-16, H-15', H-12''), 6.83 (d, 1H, <sup>3</sup>*J* = 8.0Hz, H-15''), 7.01 (H-12), 7.21 (br d, 1H, <sup>3</sup>*J* = 8.4Hz, H-16'), 7.32 (br s, 1H, H-12'); <sup>13</sup>C NMR (126 MHz): δ 29.0 (C-4), 30.0 (C-4''), 38.4 (C-4'), 67.3 (C-3), 67.7 (C-3''), 72.7 (C-3'), 79.0 (C-2'), 80.4 (C-2''), 96.2 (C-6'), 96.7 (C-6, C-6''), 98.4 (C-8), 100.1 (C-2, C-10''), 105.1 (C-10), 106.5 (C-8'), 106.8 (C-10'), 109.0 (C-8''), 115.6 (C-12''), 115.9 (C-12, C-15', C-15''), 116.1 (C-15), 116.8 (C-12'), 119.5 (C-16''), 120.0 (C-16), 121.5 (C-16'), 131.9 (C-11'), 132.5 (C-11), 133.3 (C-11''), 145.4 (C-14''), 145.6 (C-13, C-13''), 146.0 (C-13'), 146.4 (C-14'), 146.7 (C-14), 151.2 (C-7'), 151.9 (C-9'), 154.3 (C-5), 155.7 (C-9''), 155.8 (C-5'), 155.9 (C-5''), 156.1 (C-7''), 156.9 (C-9), 158.0 (C-7). Minor rotamer in MeOD (integral 0.30): <sup>1</sup>H NMR (500 MHz, *T* = 270K): δ 2.80 (overlapped, H-4''a), 2.94 (dd, 1H, <sup>2</sup>*J* = 17.0Hz, <sup>3</sup>*J* = 4.9Hz, H-4''b), 3.89 (br s, 1H, H-3'), 4.06 (d, 1H, <sup>3</sup>*J* = 3.4Hz, H-3), 4.24 (br, 1H, H-3''), 4.43 (d, 1H, <sup>3</sup>*J* = 3.0Hz, H-4), 4.66 (s, 1H, H-4'), 4.96 (s, 1H, H-2''), 5.25 (s, 1H, H-2'), 5.89 (s, 1H, H-6'), 6.01 (d, 1H, <sup>4</sup>*J* = 1.9Hz, H-6), 6.06 (d, 1H, <sup>4</sup>*J* = 1.9Hz, H-8), 6.10 (s, 1H, H-6''), 6.73 (overlapped, H-15), 6.76 (d, 1H, <sup>3</sup>*J* = 8.0Hz, H-15''), 6.80 (overlapped, H-15'), 6.86 (br d, 1H, <sup>3</sup>*J* = 8.4Hz, H-16''), 6.91 (br d, 1H, <sup>3</sup>*J* = 8.0Hz, H-16'), 7.02 (overlapped, H-16), 7.07 (br, 1H, H-12'), 7.10 (br, 1H, H-12''), 7.14 (br, 1H, H-12); <sup>13</sup>C NMR (126 MHz): δ 29.6 (C-4), 30.3 (C-4''), 38.4 (C-4'), 67.2 (C-3''), 68.6 (C-3), 73.3 (C-3'), 79.0 (C-2'), 79.9 (C-2''), 96.8 (C-8, C-6''), 97.6 (C-6'), 98.5 (C-6), 100.3 (C-10''), 100.4 (C-2), 104.4 (C-10), 105.5 (C-8''), 107.3 (C-8'), 107.7 (C-10'), 115.3 (C-12''), 116.0 (C-12), 116.3 (C-12', C-15''), 116.4 (C-15'), 119.2 (C-16''), 119.9 (C-16), 120.7 (C-16'), 131.8 (C-11'), 132.3 (C-11''), 132.7 (C-11), 145.7

(C-13), 146.3 (C-14'), 152.6 (C-9'), 154.1 (C-5), 154.9 (C-7''), 156.6 (C-5'), 157.3 (C-9).

Major rotamer in DMSO (integral 1.0):  $^1\text{H}$  NMR (500 MHz):  $\delta$  2.35 (dd, 1H,  $^2J = 16.0\text{Hz}$ ,  $^3J = 5.2\text{Hz}$ , H-4''a), 2.68 (dd, 1H,  $^2J = 16.1\text{Hz}$ ,  $^3J = 3.9\text{Hz}$ , H-4''b), 3.76 (br, 1H, H-3'), 3.83 (br, 1H, H-3), 4.17 (br, 1H, H-3''), 4.27 (br d, 1H,  $^3J = 2.0\text{Hz}$ , H-4), 4.46 (s, 1H, H-4'), 4.93 (s, 1H, H-2''), 5.11 (s, 1H, H-2'), 5.79 (s, 1H, H-6''), 5.86 (d, 1H,  $^4J = 2.2\text{Hz}$ , H-8), 5.89 (d, 1H,  $^4J = 2.2\text{Hz}$ , H-6), 5.93 (s, 1H, H-6'), 6.62 (d, 1H,  $^3J = 8.3\text{Hz}$ , H-15'), 6.68 (br, H-15''), 6.74 (d, 1H,  $^3J = 8.3\text{Hz}$ , H-15), 6.79 (dd, 1H,  $^3J = 8.3\text{Hz}$ ,  $^4J = 1.6\text{Hz}$ , H-16), 6.85 (dd, 1H,  $^3J = 8.0\text{Hz}$ ,  $^4J = 2.0\text{Hz}$ , H-16'), 6.91 (overlapped, H-16''), 6.92 (br, 1H, H-12'), 7.00 (d, 1H,  $^4J = 1.8\text{Hz}$ , H-12''), 7.01 (d, 1H,  $^4J = 2.0\text{Hz}$ , H-12). Minor rotamer in DMSO (integral 0.66):  $^1\text{H}$  NMR (500 MHz):  $\delta$  2.50 (overlapped, H-4''a), 2.61 (br, 1H, H-4''b), 3.42 (overlapped, H-3), 3.68 (br, 1H, H-3''), 3.90 (br, 1H, H-3'), 4.04 (d, 1H,  $^3J = 3.3\text{Hz}$ , H-4), 4.23 (s, 1H, H-2''), 4.27 (overlapped, 1H, H-4'), 5.39 (s, 1H, H-2'), 5.65 (s, 1H, H-6'), 5.77 (d, 1H,  $^4J = 2.2\text{Hz}$ , H-6), 5.82 (d, 1H,  $^4J = 2.2\text{Hz}$ , H-8), 6.05 (s, 1H, H-6''), 6.51 (dd, 1H,  $^3J = 8.3\text{Hz}$ ,  $^4J = 1.6\text{Hz}$ , H-16''), 6.67 (overlapped, H-15''), 6.68 (overlapped, H-16, H-12''), 6.72 (br, 1H, H-15'), 6.74 (br, 1H, H-15), 6.95 (d, 1H,  $^4J = 1.8\text{Hz}$ , H-12), 6.98 (dd, 1H,  $^3J = 8.2\text{Hz}$ ,  $^4J = 1.8\text{Hz}$ , H-16'), 7.19 (d, 1H,  $^4J = 1.8\text{Hz}$ , H-12').

**Cinnamtannin D1 (2).** Major rotamer in MeOD (integral 1.0):  $^1\text{H}$  NMR (500 MHz,  $T = 270\text{K}$ ):  $\delta$  2.45 (dd, 1H,  $^2J = 16.5\text{Hz}$ ,  $^3J = 10.3\text{Hz}$ , H-4''a), 3.05 (dd, 1H,  $^2J = 16.5\text{Hz}$ ,  $^3J = 6.2\text{Hz}$ , H-4''b), 3.46 (d, 1H,  $^3J = 3.3\text{Hz}$ , H-3), 3.67 (br, 1H, H-3''), **3.96 (d, 1H,  $^3J = 9.3\text{Hz}$ , H-2'')**, 4.00 (d, 1H,  $^3J = 3.3\text{Hz}$ , H-4), 4.06 (br s, 1H, H-3'), 4.53 (s, 1H, H-4'), 5.52 (s, 1H, H-2'), 5.84 (s, 1H, H-6'), 5.94 (d, 1H,  $^4J = 1.9\text{Hz}$ , H-6), 6.00 (d, 1H,  $^4J = 1.9\text{Hz}$ , H-8), 6.10 (s, 1H, H-6''), 6.66 (dd, 1H,  $^3J = 8.2\text{Hz}$ ,  $^4J = 1.7\text{Hz}$ , H-16''), 6.75 (d, 1H,  $^4J = 1.7\text{Hz}$ , H-12'') 6.76 (d, 1H,  $^3J = 8.3\text{Hz}$ , H-15''), 6.84 (d, 2H,  $^3J = 8.3\text{Hz}$ , H-15, H-15'), 6.94 (dd, 1H,  $^3J = 8.6\text{Hz}$ ,  $^4J = 1.9\text{Hz}$ , H-16), 7.07 (d, 1H,  $^3J = 2.1\text{Hz}$ , H-12), 7.09 (dd, 1H,  $^3J = 8.2\text{Hz}$ ,  $^4J = 1.9\text{Hz}$ , H-16'), 7.23 (d, 1H,  $^4J = 1.3\text{Hz}$ , H-12');  $^{13}\text{C}$  NMR (126 MHz):  $\delta$  29.1 (C-4), 30.8 (C-4''), 38.4

(C-4'), 67.3 (C-3), 70.2 (C-3''), 72.6 (C-3'), 78.8 (C-2'), 83.5 (C-2''), 96.2 (C-6'), 96.6 (C-6''), 96.7 (C-8), 98.5 (C-6), 100.2 (C-2), 101.9 (C-10''), 105.2 (C-10), 106.4 (C-8'), 106.7 (C-10'), 108.8 (C-8''), 115.9 (C-12, C-15'), 116.0 (C-12''), 116.4 (C-15, C-15''), 116.7 (C-12'), 120.1 (C-16), 120.2 (C-16''), 121.2 (C-16'), 131.7 (C-11'), 132.6 (C-11), 132.8 (C-11''), 145.6 (C-13, C-13''), 145.9 (C-14''), 146.0 (C-13'), 146.4 (C-14'), 146.8 (C-14), 151.2 (C-7'), 151.9 (C-9'), 154.3 (C-5), 155.5 (C-5'', C-7'', C-9''), 156.0 (C-5'), 156.8 (C-9), 157.9 (C-7). Minor rotamer in MeOD (integral 0.24): <sup>1</sup>H NMR (500 MHz, *T* = 270K): δ 2.60 (dd, 1H, <sup>2</sup>*J* = 16.4Hz, <sup>3</sup>*J* = 5.6Hz, H-4''a), 2.66 (dd, 1H, <sup>2</sup>*J* = 16.4Hz, <sup>3</sup>*J* = 4.4Hz, H-4''b), 4.02 (br s, 1H, H-3'), 4.08 (d, 1H, <sup>3</sup>*J* = 3.9Hz, H-3), 4.11 (q, 1H, <sup>3</sup>*J* = 5.4Hz, H-3''), 4.44 (d, 1H, <sup>3</sup>*J* = 3.3Hz, H-4), 4.70 (s, 1H, H-4'), 4.92 (d, 1H, <sup>3</sup>*J* = 5.5Hz, H-2''), 5.33 (s, 1H, H-2'), 5.87 (s, 1H, H-6''), 6.00 (d, 1H, <sup>4</sup>*J* = 2.4Hz, H-6), 6.07 (d, 1H, <sup>4</sup>*J* = 2.4Hz, H-8), 6.09 (s, 1H, H-6'), 6.72 (d, 1H, <sup>3</sup>*J* = 8.0Hz, H-15''), 6.79 (d, 1H, <sup>3</sup>*J* = 8.0Hz, H-15'), 6.81 (d, 1H, <sup>3</sup>*J* = 8.3Hz, H-15), 6.85 (overlapped, 1H, H-12''), 6.87 (dd, 1H, <sup>3</sup>*J* = 8.3Hz, <sup>4</sup>*J* = 1.9Hz, H-16''), 6.96 (dd, 1H, <sup>3</sup>*J* = 8.4Hz, <sup>4</sup>*J* = 1.9Hz, H-16'), 7.04 (dd, 1H, <sup>3</sup>*J* = 8.1Hz, <sup>4</sup>*J* = 2.0Hz, H-16), 7.13 (d, 1H, <sup>3</sup>*J* = 2.0Hz, H-12'), 7.16 (d, 1H, <sup>3</sup>*J* = 2.1Hz, H-12); <sup>13</sup>C NMR (126 MHz): δ 26.9 (C-4''), 29.6 (C-4), 38.0 (C-4'), 68.5 (C-3''), 68.6 (C-3), 72.8 (C-3'), 79.2 (C-2'), 82.2 (C-2''), 96.5 (C-6'), 96.8 (C-8), 97.2 (C-6''), 98.5 (C-6), 100.4 (C-2), 100.7 (C-10''), 104.3 (C-10), 105.7 (C-10'), 106.9 (C-8'), 108.3 (C-8''), 114.7 (C-12'', C-15''), 115.8 (C-15), 115.9 (C-12), 116.2 (C-15'), 116.4 (C-12'), 119.5 (C-16''), 119.9 (C-16), 120.8 (C-16'), 131.8 (C-11'), 132.8 (C-11), 145.0 (C-14''), 145.8 (C-13'), 146.2 (C-14', C-13''), 146.8 (C-14), 152.6 (C-9'), 153.9 (C-9''), 156.0 (C-7''), 157.2 (C-5'). Major rotamer in DMSO (integral 1.0): <sup>1</sup>H NMR (500 MHz): δ 2.36 (br, 1H, H-4''a), 2.42 (br, 1H, H-4''b), 3.77 (br, 1H, H-3'), 3.81 (br d, 1H, <sup>3</sup>*J* = 2.8Hz, H-3), 3.91 (q, 1H, <sup>3</sup>*J* = 5.3Hz, H-3''), 4.26 (d, 1H, <sup>3</sup>*J* = 3.2Hz, H-4), 4.44 (br s, 1H, H-4'), 4.48 (d, 1H, <sup>3</sup>*J* = 5.3Hz, H-2''), 4.86 (d, 1H, <sup>3</sup>*J* = 5.3Hz, OH-3'), 5.19 (s, 1H, H-2'), 5.30 (br d, 1H, <sup>3</sup>*J* = 3.2Hz, OH-3), 5.77 (s, 1H, H-6''), 5.86 (d, 1H, <sup>4</sup>*J* = 2.3Hz, H-8), 5.87 (d, 1H, <sup>4</sup>*J* = 2.3Hz, H-

6), 5.92 (s, 1H, H-6'), 6.62 (d, 1H,  $^3J = 7.8\text{Hz}$ , H-15''), 6.70 (d, 1H,  $^3J = 7.8\text{Hz}$ , H-15'), 6.73 (d, 1H,  $^4J = 2.3\text{Hz}$ , H-12''), 6.74 (d, 1H,  $^3J = 8.5\text{Hz}$ , H-15), 6.78 (dd, 1H,  $^3J = 8.2\text{Hz}$ ,  $^4J = 1.9\text{Hz}$ , H-16''), 6.85 (dd, 1H,  $^3J = 7.8\text{Hz}$ ,  $^4J = 1.9\text{Hz}$ , H-16), 6.92 (dd, 1H,  $^3J = 8.2\text{Hz}$ ,  $^4J = 1.9\text{Hz}$ , H-16'), 6.94 (d, 1H,  $^4J = 1.9\text{Hz}$ , H-12'), 7.00 (d, 1H,  $^4J = 1.9\text{Hz}$ , H-12). Minor rotamer in DMSO (integral 0.42):  $^1\text{H}$  NMR (500 MHz):  $\delta$  2.24 (dd, 1H,  $^2J = 16.1\text{Hz}$ ,  $^3J = 9.5\text{Hz}$ , H-4''a), 2.79 (dd, 1H,  $^2J = 16.1\text{Hz}$ ,  $^3J = 5.6\text{Hz}$ , H-4''b), 3.47 (overlapped, H-3''), 3.49 (d, 1H,  $^3J = 3.6\text{Hz}$ , H-3), 3.80 (overlapped, 1H, H-2''), 3.82 (overlapped, H-4), 3.87 (br, 1H, H-3'), 4.24 (s, 1H, H-4'), 4.81 (d, 1H,  $^3J = 4.1\text{Hz}$ , OH-3') 5.23 (s, 1H, H-2'), 5.66 (s, 1H, H-6'), 5.73 (d, 1H,  $^4J = 2.3\text{Hz}$ , H-6), 5.81 (d, 1H,  $^4J = 2.3\text{Hz}$ , H-8), 6.06 (s, 1H, H-6''), 6.44 (dd, 1H,  $^3J = 8.2\text{Hz}$ ,  $^4J = 1.6\text{Hz}$ , H-16''), 6.58 (d, 1H,  $^4J = 1.6\text{Hz}$ , H-12''), 6.68 (d, 1H,  $^3J = 8.0\text{Hz}$ , H-15''), 6.73 (overlapped, H-15'), 6.76 (overlapped, H-16), 6.77 (overlapped, H-15), 6.96 (overlapped, H-16'), 6.98 (d, 1H,  $^4J = 2.1\text{Hz}$ , H-12), 7.12 (d, 1H,  $^4J = 1.8\text{Hz}$ , H-12').

***Aesculitannin B (3)***. Major rotamer in MeOD (integral 1.0):  $^1\text{H}$  NMR (500 MHz,  $T = 270\text{K}$ ):  $\delta$  2.76 (br d, 1H,  $^2J = 17.2\text{Hz}$ , H-4''a), 2.87 (dd, 1H,  $^2J = 17.2\text{Hz}$ ,  $^3J = 4.8\text{Hz}$ , H-4''b), 3.26 (d, 1H,  $^3J = 3.4\text{Hz}$ , H-3), 3.94 (d, 1H,  $^3J = 3.5\text{Hz}$ , H-4), 4.06 (br d, 1H,  $^3J = 4.1\text{Hz}$ , H-3''), 4.36 (br s, 1H, H-2''), 4.51 (d, 1H,  $^3J = 8.8\text{Hz}$ , H-4'), 4.56 (t, 1H,  $^3J = 8.7\text{Hz}$ , H-3'), 4.61 (d, 1H,  $^3J = 9.4\text{Hz}$ , H-2'), 5.78 (s, 1H, H-6'), 5.83 (d, 1H,  $^4J = 2.3\text{Hz}$ , H-6), 5.98 (d, 1H,  $^4J = 2.3\text{Hz}$ , H-8), 6.06 (s, 1H, H-6''), 6.79 (d, 1H,  $^3J = 8.1\text{Hz}$ , H-15''), 6.83 (br, 2H, H-15, H-16), 6.89 (d, 1H,  $^3J = 8.2\text{Hz}$ , H-15'), 6.90 (dd, 1H,  $^3J = 8.2\text{Hz}$ ,  $^4J = 1.7\text{Hz}$ , H-16''), 6.98 (d, 1H,  $^4J = 1.7\text{Hz}$ , H-12''), 6.99 (d, 1H,  $^4J = 2.0\text{Hz}$ , H-12), 7.16 (dd, 1H,  $^3J = 8.2\text{Hz}$ ,  $^4J = 2.0\text{Hz}$ , H-16'), 7.19 (d, 1H,  $^4J = 2.0\text{Hz}$ , H-12');  $^{13}\text{C}$  NMR (126 MHz):  $\delta$  29.1 (C-4), 30.3 (C-4''), 39.2 (C-4'), 67.2 (C-3), 67.8 (C-3''), 74.1 (C-3'), 79.8 (C-2''), 84.7 (C-2'), 96.6 (C-8, C-6''), 97.3 (C-6'), 98.0 (C-6), 100.3 (C-2), 101.0 (C-10''), 104.2 (C-10), 107.0 (C-8'), 108.8 (C-8''), 109.1 (C-10'), 115.4 (C-12''), 115.8 (C-12, C-15''), 116.1 (C-15), 116.5 (C-15'), 116.7 (C-12'), 119.4 (C-16''), 120.0 (C-16), 121.3 (C-16'), 131.2 (C-11'), 132.4 (C-11), 133.1 (C-11''), 145.4 (C-13), 145.7

(C-14), 146.0 (C-13''), 146.3 (C-13'), 146.8 (C-14'), 146.9 (C-14''), 151.4 (C-7'), 152.4 (C-9'), 154.1 (C-9), 155.4 (C-9''), 155.6 (C-5'), 156.4 (C-5'', C7''), 156.7 (C-5), 158.1 (C-7).

Major rotamer in DMSO (integral 1.0): <sup>1</sup>H NMR (500 MHz): δ 2.61 (br, 1H, H-4''a), 2.71 (br, 1H, H-4''b), 3.85 (br d, 1H, <sup>3</sup>J = 3.0Hz, H-3), 4.10 (d, 1H, <sup>3</sup>J = 3.1Hz, H-4), 4.29 (br, 1H, H-3'), 4.35 (d, 1H, <sup>3</sup>J = 9.6Hz, H-2'), 4.41 (br, 1H, H-4'), 4.82 (s, 1H, H-2''), 5.80 (d, 1H, <sup>4</sup>J = 2.4Hz, H-6), 5.84 (d, 1H, <sup>4</sup>J = 2.4Hz, H-8), 5.85 (s, 1H, H-6'), 5.86 (s, 1H, H-6''), 6.65 – 6.60 (m, 5H, H-15, H-15', H-16', H-15'', H-16''), 6.82 (dd, 1H, <sup>3</sup>J = 8.1Hz, <sup>4</sup>J = 2.2Hz, H-16), 6.92 (d, 1H, <sup>4</sup>J = 1.9Hz, H-12''), 6.93 ((d, 1H, <sup>4</sup>J = 1.8Hz, H-12'), 6.97 ((d, 1H, <sup>4</sup>J = 2.1Hz, H-12).

Minor rotamer in DMSO (integral 0.8): <sup>1</sup>H NMR (500 MHz): δ 2.51 (overlapped, H-4''a), 2.63 (br, 1H, H-4''b), 3.36 (overlapped, H-3), 3.88 (d, 1H, <sup>3</sup>J = 3.2Hz, H-4), 3.92 (br s, 1H, H-3''), 4.17 (br, 1H, H-3'), 4.19 (s, 1H, H-2''), 4.31 (d, 1H, <sup>3</sup>J = 9.2Hz, H-4'), 4.43 (br, 1H, H-2'), 5.62 (s, 1H, H-6'), 5.72 (d, 1H, <sup>4</sup>J = 2.4Hz, H-6), 5.81 (d, 1H, <sup>4</sup>J = 2.4Hz, H-8), 5.97 (s, 1H, H-6''), 6.65 – 6.93 (9H, H-12, H-15, H-16, H-12', H-15', H-16', H-12'', H-15'', H-16'').

**Lindetannin (4).** Major rotamer in MeOD (integral 1.0): <sup>1</sup>H NMR (500 MHz, T = 270K): δ 2.43 (dd, 1H, <sup>2</sup>J = 16.5Hz, <sup>3</sup>J = 10.0Hz, H-4''a), 3.03 (dd, 1H, <sup>2</sup>J = 16.4Hz, <sup>3</sup>J = 6.4Hz, H-4''b), 3.64 (d, 1H, <sup>3</sup>J = 3.0Hz, H-3), 3.72 (d, 1H, <sup>3</sup>J = 3.0Hz, H-4), 3.77 (br, 1H, H-3''), 3.92 (d, 1H, <sup>3</sup>J = 9.1Hz, H-2''), 4.35 (t, 1H, <sup>3</sup>J = 9.2Hz, H-3'), 4.45 (d, 1H, <sup>3</sup>J = 8.8Hz, H-4'), 4.48 (d, 1H, <sup>3</sup>J = 9.7Hz, H-2'), 5.81 (d, 1H, <sup>4</sup>J = 2.0Hz, H-6), 5.85 (s, 1H, H-6'), 6.00 (d, 1H, <sup>4</sup>J = 1.9Hz, H-8), 6.06 (s, 1H, H-6''), 6.77 (dd, 1H, <sup>3</sup>J = 7.9Hz, <sup>4</sup>J = 1.5Hz, H-16''), 6.84 (d, 2H, <sup>3</sup>J = 7.2Hz, H-15, H-15''), 6.90 (d, 1H, <sup>3</sup>J = 8.2Hz, H-15'), 6.93 (d, 1H, <sup>4</sup>J = 1.5Hz, H-12''), 6.97 (br, 1H, H-16), 6.98 (br, 1H, H-16'), 7.06 (d, 1H, <sup>4</sup>J = 1.7Hz, H-12'), 7.10 (d, 1H, <sup>4</sup>J = 1.9Hz, H-12); <sup>13</sup>C NMR (126 MHz): δ 29.0 (C-4), 31.0 (C-4''), 39.0 (C-4'), 67.4 (C-3), 69.8 (C-3''), 74.5 (C-3'), 83.0 (C-2''), 84.5 (C-2'), 96.5 (C-6''), 96.6 (C-8), 97.3 (C-6'), 98.0 (C-6), 100.4 (C-2), 102.5 (C-10''), 104.2 (C-10), 106.8 (C-8'), 108.9 (C-8''), 109.1 (C-10'), 115.8 (C-12''), 115.9 (C-12), 116.0 (C-15''), 116.3 (C-15), 116.6 (C-12', C-15'), 120.1 (C-16), 120.9 (C-16',



C-16''), 131.4 (C-11'), 132.5 (C-11), 132.6 (C-11''), 145.8 (C-13), 146.1 (C-14, C-13', C-13''), 146.7 (C-14'), 146.9 (C-14''), 151.3 (C-7'), 152.5 (C-9'), 154.2 (C-9), 155.1 (C-7''), 155.5 (C-9''), 155.7 (C-5''), 156.4 (C-5'), 156.6 (C-5), 158.1 (C-7). Major rotamer in DMSO (integral 1.0):  $^1\text{H}$  NMR (500 MHz):  $\delta$  2.36 (br, 1H, H-4''a), 2.82 (br, 1H, H-4''b), 3.55 (br, 1H, H-3''), 3.83 (br t, 1H,  $^3J = 3.7\text{Hz}$ , H-3), 4.07 (d, 1H,  $^3J = 3.7\text{Hz}$ , H-4), 4.20 (br, 1H, H-3'), 4.26 (d, 1H,  $^3J = 8.5\text{Hz}$ , H-4'), 4.31 (d, 1H,  $^3J = 9.4\text{Hz}$ , H-2'), 4.40 (d, 1H,  $^3J = 8.8\text{Hz}$ , H-2''), 5.78 (d, 1H,  $^4J = 2.3\text{Hz}$ , H-6), 5.82 (s, 2H, H-6', H6''), 5.83 (d, 1H,  $^4J = 2.3\text{Hz}$ , H-8), 6.66 (d, 1H,  $^3J = 8.2\text{Hz}$ , H-15''), 6.71 (br, H-15'), 6.73 (br, H-12''), 6.78 (br, H-15, H-16''), 6.81 (br, H-16'), 6.82 (br, H-16), 6.91 (d, 1H,  $^4J = 1.7\text{Hz}$ , H-12'), 6.97 (br, 1H, H-12). Minor rotamer in DMSO (integral 0.6):  $^1\text{H}$  NMR (500 MHz):  $\delta$  2.24 (dd, 1H,  $^2J = 16.5\text{Hz}$ ,  $^3J = 10.3\text{Hz}$ , H-4''a), 2.82 (br, 1H, H-4''b), 3.57 (br, 1H, H-3''), 3.60 (d, 1H,  $^3J = 3.7\text{Hz}$ , H-4), 3.63 (d, 1H,  $^3J = 3.6\text{Hz}$ , H-3), 3.75 (d, 1H,  $^3J = 9.6\text{Hz}$ , H-2''), 3.98 (overlapped, H-3'), 4.23 (d, 1H,  $^3J = 5.9\text{Hz}$ , H-4'), 4.26 (overlapped, H-2'), 5.66 (s, 1H, H-6'), 5.68 (d, 1H,  $^4J = 2.3\text{Hz}$ , H-6), 5.82 (overlapped, H-8), 5.97 (s, 1H, H-6''), 6.54 (dd, 1H,  $^3J = 8.1\text{Hz}$ ,  $^4J = 1.6\text{Hz}$ , H-16''), 6.70 (overlapped, H-15, H-15''), 6.73 (overlapped, H-12), 6.75 (d, 1H,  $^4J = 1.7\text{Hz}$ , H-12''), 6.78 (overlapped, H-16'), 6.81 (overlapped, H-16), 6.83 (overlapped, H-15'), 6.97 (overlapped, H-12').

### $\Delta G^{298}$ calculations procedure from the $^1\text{H}$ temperature NMR spectra

For 1-4 the  $\Delta G$  values were calculated using the Eyring's equation:

$$\Delta G_{T_c} = 4.58T_c * \left(10.32 + \log \frac{T_c}{k_c}\right)$$

where  $T_c$  is the coalescence temperature and  $k_c$  is the rate constant at the coalescence temperature.

In order to calculate  $k_c$  from the NMR spectra, one has to measure the separation between the NMR signals (in Hz) at temperature far away from the coalescence temperature ( $\Delta\nu$ ):

$$k_c = \frac{\pi * \Delta\nu}{\sqrt{2}}$$

Here,  $\Delta\nu$  values were measured for 230K.

Coalescence temperature is different for different signals and depends on the signal separation and the differences in the chemical environment of the given nucleus in both rotamers. In many cases the coalescence temperature exceeded the boiling point of the solvent (methanol). Then, it is possible to estimate  $T_c$  from linear approximation: one has to measure signals separation values in Hz ( $\Delta\nu$ ) for different temperatures and find T at which  $\Delta\nu=0$  (coalescence temperature).

The differences in the coalescence temperatures for different signals in the same compound result in the different Gibbs free energies. In order to calculate  $\Delta G$  at 298K one can take the obtained  $\Delta G$  values and plot them against temperatures for which they were calculated. Then, again from linear approximation,  $\Delta G^{298}$  can be calculated. The  $\Delta\nu$ ,  $T_c$ ,  $k_c$ , and  $\Delta G^{T_c}$  values obtained in the present paper are available upon request.

The applied  $\Delta G^{298}$  calculation method implies the usage of linear approximation twice and therefore, despite very good linear correlations, the obtained results are encumbered with error and, as such, are only estimated values.
